# How much (ATP) does it cost to build a trypanosome?

A theoretical study on the quantity of ATP needed to maintain and duplicate a bloodstream-form *Trypanosoma brucei* cell

Janaina F. Nascimento<sup>1</sup>, Rodolpho O. O. Souza<sup>1</sup>, Mayke B. Alencar<sup>1</sup>, Sabrina Marsiccobetre<sup>1</sup>, Ana M. Murillo<sup>1</sup>, Flávia S. Damasceno, Richard B. M. M. Girard, Letícia Marchese, Luis A. Luévano-Martinez, Renan W. Achjian, Jurgen R. Haanstra<sup>2</sup>, Paul A. M. Michels,<sup>3</sup> and Ariel M. Silber<sup>1</sup>

<sup>1</sup>Laboratory of Biochemistry of Tryps – LaBTryps, Department of Parasitology, Institute of Biomedical Sciences, University of São Paulo – São Paulo, Brazil.

<sup>2</sup>Systems Biology Lab, Amsterdam Institute of Molecular and Life Sciences (AIMMS), Vrije Universiteit Amsterdam, NL1081HZ Amsterdam, The Netherlands.

<sup>3</sup>School of Biological Sciences, The University of Edinburgh, Edinburgh, UK.

<sup>∞</sup>Corresponding Authors: Ariel M. Silber, email: [asilber@usp.br](mailto:asilber@usp.br)  
Paul A. M. Michels, email: [paul.michels@ed.ac.uk](mailto:paul.michels@ed.ac.uk)

## Abstract

ATP hydrolysis is required for the synthesis, transport and polymerization of monomers for macromolecules as well as for the assembly of the latter into cellular structures. Other cellular processes not directly related to synthesis of biomass, such as maintenance of membrane potential and cellular shape, also require ATP. The unicellular flagellated parasite *Trypanosoma brucei* has a complex digenetic life cycle. The primary energy source for this parasite in its bloodstream form (BSF) is glucose, which is abundant in the host's bloodstream. Here, we made a detailed estimation of the energy budget during the BSF cell cycle. As glycolysis is the source of most produced ATP, we calculated that a single parasite produces  $6 \times 10^{11}$  molecules of ATP/cell cycle. Biomass production accounts for ~62% of the total energy budget, with translation being the most expensive process. Flagellar motility, variant surface glycoprotein recycling, transport and maintenance of transmembrane potential account for less than 30% of the consumed ATP. Finally, there is still ~9% available in the budget that is being used for other cellular processes of unknown cost. These data put a new perspective on the assumptions about the relative energetic weight of the processes a BSF trypanosome undergoes during its cell cycle.

## Abstract Importance

Cells use ATP as the main energy currency for the synthesis, organization and maintenance of their macromolecules and cellular structures, in order to stay alive and proliferate. For this purpose, ATP is produced from external nutrients, and is spent by cells in the many processes that are necessary for maintenance and building up new cells. Despite its relevance and the impressive quantity of biological data available, very little is known about how much ATP is required for maintaining and duplicating a cell. In this paper, we present a calculation on how much of the ATP produced by catabolism of the nutrient glucose is used to energize the different processes known to occur during the cell cycle of the infective form of the trypanosomatid parasite that causes human sleeping sickness, the bloodstream form of *Trypanosoma brucei*.

## Introduction

ATP hydrolysis provides most of the free energy used by cells to power biological processes including the metabolic reactions required to build up the biomass for cell proliferation and maintenance. It is possible to estimate the amount of ATP hydrolysis needed for most biological processes and thereby calculate the global ATP expenditure by a cell (Flamholz et al., 2014). During the process of building a new cell, ATP hydrolysis is required for synthesis and polymerization of monomers such as dNTPs and rNTPs for nucleic acids, amino acids for proteins, fatty acids for phospholipids and monosaccharides for oligo- and polysaccharides. ATP hydrolysis is also required for the assembly of complex cell structures such as macromolecular complexes and organelles. Cells may acquire precursors for monomer synthesis or take up ready-to-use monomers from the extracellular environment, but these also require ATP hydrolysis. Furthermore, ATP is necessary for other cellular processes that are not directly related to the synthesis of biomass, such as maintenance of membrane potentials and cellular shape, self-organization, motility, and turnover of molecules.

Parasitic organisms are intriguing in that they may differ in many aspects of their energy expenditure from their free-living counterparts. On the one hand, they may abandon (a sometimes very large) part of their biosynthetic activities if they can acquire multiple nutrients from their host. On the other hand, they may have to invest considerable energy in invasion of the host and in strategies to survive in an environment that tries to tame or kill them (Gadelha et al., 2011). For the present work, we set out to estimate the energy expenditure of the trypanosomatid parasite *Trypanosoma brucei*. *T. brucei* is a unicellular flagellated parasite with a complex life cycle involving insect and mammalian hosts. During its life cycle, *T. brucei* transitions through different cell forms, each one adapted to the specificities of the environment it colonizes. In the gut of the insect vector – the tsetse fly –, amino acids such as proline are abundant and serve preferentially as the energy source for the so-called procyclic trypanosome when glucose is absent (Lamour et al., 2005; Mantilla et al., 2017). In the bloodstream of the mammalian host *T. brucei* can occur in two different developmental forms: long-slender, proliferating trypanosomes and short-

stumpy forms. When triggered by a quorum-sensing mechanism, the long-slender trypanosomes differentiate to non-proliferating short-stumpy forms which are competent to develop into procyclic forms when ingested by a tsetse fly (Rojas et al., 2019).

In the blood of the mammalian host, glucose is abundantly available, and it is well established that it is the main source of ATP used by the proliferative bloodstream form (BSF) of the parasite for its proliferation and to survive different environmental challenges (Ryley, 1962; Visser and Oppendoes, 1980). Both procyclic and bloodstream forms of *T. brucei* can be easily cultivated *in vitro* in semi- or completely defined media (Creek et al., 2013; Hirumi and Hirumi, 1989), which has enabled the detailed investigation of the end-products obtained from different substrates as well as the estimation of metabolic fluxes. In these organisms, the major part of the glycolytic pathway is compartmentalized in peroxisome-related organelles called glycosomes (Michels et al., 2021; Oppendoes and Borst, 1977). Noteworthy, while procyclic forms can oxidize metabolites (including glucose-derived pyruvate) in their single mitochondrion, under most conditions the BSF obtain their energy by aerobic fermentation with no involvement of oxidative phosphorylation.

The total energy cost of a biological process can be expressed as the summation of the direct costs (amount of the necessary ATP hydrolysis) spent on all energy-requiring processes (Mahmoudabadi et al., 2019). In contrast to most bacteria and yeasts, BSF *T. brucei* use very little of the glucose consumed to synthesize biomass (Haanstra et al., 2012). Noteworthy, these trypanosomes depend on extracellular availability of other essential nutrients to serve as carbon sources for the biosynthesis of precursors of macromolecules for biomass. Thus, knowledge of the rate of glucose consumption, together with the fact that almost all glucose consumed by the BSF is directed to ATP formation allows calculation of the total amount of ATP produced per cell cycle. We can also estimate the ATP expenditure during a cell cycle as other relevant parameters are known such as doubling time, molecular content, genome size, transcriptome and proteome half-lives, and cell motility.

For some free-living prokaryotic and eukaryotic microorganisms calculations of metabolic energy obtained (mostly transduced into ATP) from external sources have been reported previously (Lynch and Marinov, 2017, 2015; Stouthamer, 1973). These calculations included energy obtained from external sources (oxidation of organic or inorganic molecules; absorbance of light) through different processes and the energy used for different activities (biosynthesis of macromolecules, biogenesis of (sub)cellular structures, transmembrane transport of molecules, motility, *etc.*). Here, we present a detailed estimation of the energy (ATP) budget and the energy costs of the two main commitments that a long-slender BSF *T. brucei* has during a cell cycle: to stay alive (maintenance) and to make a new cell (duplication). We found that the production of biomass, including the turnover of parts of its components under standard cultivation conditions, accounts for approximately 62% of the energy budget, with translation being the most “expensive” process. We estimated the extent to which several other cellular processes are responsible for using the remaining ATP that these cells produce.

## Results

### How much ATP is produced by *T. brucei* BSF during a cell cycle?

The BSF *T. brucei* model studied

The BSF of *T. brucei* is one of the relevant trypanosomatids for public health, and the availability of data about the various activities it exerts when parasitizing its mammalian hosts, such as proliferation, catabolic and anabolic processes, endocytosis, motility, among others led us to select it to estimate its ATP budget for cell maintenance during a cell cycle and for making an entirely new cell. Most data used for calculation of the ATP production have previously been obtained by using *T. brucei* strain Lister 427, BSF cell line 449 (Haanstra et al., 2012). Trypanosomes of this Lister 427 strain are monomorphic, with the BSF occurring only as proliferating long-slender forms because they are incapable of differentiating to stumpy forms. Within specific cell densities *in vitro* growth is exponential and the specific glycolytic flux is constant (Haanstra et al., 2012). For the costs of making

the building blocks of the cell such as dNTPs and amino acids, we used available data on the characterized biosynthetic pathways as well as the genome annotation for the presence of still uncharacterized pathways. For those biological processes in which energy costs are not yet fully understood for *T. brucei*, we made inferences based on data available for other organisms.

As previously mentioned, BSF *T. brucei* rely (almost) completely on glycolysis for their energy requirements and excrete nearly all pyruvate produced rather than further oxidizing it in the mitochondrion (Haanstra et al., 2012). The first seven enzymes of the glycolytic pathway are compartmentalized in peroxisome-related organelles called glycosomes (Opperdoes and Borst, 1977). The reoxidation of the glycolytically produced NADH occurs through the transfer of the electrons by a shuttle mechanism from the glycosomes to the mitochondrion, in which glycolytically produced dihydroxyacetone phosphate is reduced to glycerol 3-phosphate with the concomitant oxidation of NADH to NAD<sup>+</sup> by a glycosomal glycerol-3-phosphate dehydrogenase. In turn, the produced glycerol-3-phosphate is oxidized back to dihydroxyacetone phosphate by a mitochondrial glycerol-3-phosphate dehydrogenase, with the concomitant reduction of FAD to FADH<sub>2</sub> which, in aerobic conditions, is reoxidized to FAD by the transfer of electrons to oxygen catalyzed by the trypanosome alternative oxidase (Helfert et al., 2001). Summarizing, this shuttle occurs without classical oxidative phosphorylation (OxPhos) (Michels et al., 2021; Opperdoes and Borst, 1977). In fact, in this stage of the parasite's life cycle, enzymes of the tricarboxylic acid (TCA) cycle are either absent or severely downregulated (Zíková et al., 2017), and the F<sub>1</sub>F<sub>0</sub>-ATP synthase complex works in “reverse mode” accounting for an H<sup>+</sup>/ATPase activity pumping protons into the intermembrane space, for the maintenance of the mitochondrial membrane potential (Nolan and Voorheis, 1992; Schnauffer et al., 2005). Due to the absence of classical OxPhos, glycolysis is the main source of ATP in BSFs (Opperdoes, 1987). Net production of ATP, and thus the free-energy yield of glycolysis occurs in the cytosol and almost entirely comes from the flux through the enzyme pyruvate kinase (Haanstra et al., 2012). It has been shown that some ATP synthesis can occur in the mitochondrion by the acetate:succinate CoA transferase / succinyl-CoA synthetase (ASCT/SCS) cycle, which can use as a substrate acetyl-CoA derived from relatively minute amounts of pyruvate routed to the mitochondrion and/or from threonine oxidation.

However, the amount of ATP produced by this system is small when compared to that produced by glycolysis and may vary depending on conditions. (Michels et al., 2021; Mochizuki et al., 2020). Taking all this information into account, we can proceed to make a reliable estimation of the total amount of ATP that is produced during a complete cell cycle, in which an entire *Trypanosoma* cell is built.

According to data from Haanstra et al. (2012) when BSF *T. brucei* strain Lister 427, cell line 449 was growing exponentially in HMI-9 medium (for composition see Supplementary Table S1) at 37 °C in the presence of 25 mM of glucose, the glucose consumption flux was 160 nmol/(min x 10<sup>8</sup> cells). As mentioned, virtually all consumed glucose (155.2 nmol/min x 10<sup>8</sup> cells) was directed towards pyruvate under aerobic conditions. However, it should be noted that, depending on the culture conditions, a small part of glycolytically-derived metabolites can be used for the synthesis of sugar nucleotides (Turnock and Ferguson, 2007), inositol (Martin and Smith, 2006), acetate (Creek et al., 2015; Mazet et al., 2013), amino acids such as asparagine and alanine (Creek et al., 2015), which can contribute to anabolic processes. Stoichiometrically, the glycolytic breakdown of one molecule of glucose yields two molecules of pyruvate, and each of these is accompanied with the yield of one ATP, resulting in an ATP synthesis flux of 310.4 nmol/(min x 10<sup>8</sup> cells). This flux remains constant throughout the exponential proliferation phase (Haanstra et al., 2012), and therefore we calculated the total amount of ATP produced by one cell during one cell cycle (5.3 h in the experiment by Haanstra et al. 2012; for details see Materials and Methods), which results in 6.00 x 10<sup>11</sup> molecules of ATP/(cell cycle \* cell). It is worth remarking that, despite the concentration of glucose in this culture medium is high with respect to that present in the mammalian blood, the BSF proliferation in this culture condition can be compared with the BSF proliferation in blood, since both, the medium and the blood glucose concentration (~5 mM), are more than enough to saturate the glucose uptake in these cells (Eisenthal et al., 1989; Jean Gruenberg et al., 1978; ter Kuile and Opperdoes, 1991a; Tetaud et al., 1997). The fact that the population doubling time described by Haanstra et al. is very similar to that reported previously for different *T. brucei* strains including Lister 427 in mammalian blood supports the relevance of these data (Michels, unpublished results, Doyle et al., 1980; Miller and Turner, 1981).



## The cost of genome duplication

To express and transmit its genetic information, every cell needs to duplicate and spatially organize its DNA, transcribe the information into RNA, and translate it into functional proteins. The energy requirements of each of these processes differ and include the costs of making, assembling, and processing the building blocks of each polymer. Cells duplicate their genome once during the cell cycle, which requires activated nucleotides. It has been established for yeast and bacteria that the cost of synthesis of all requisite nucleotides *de novo* from glucose is approximately 50 ATPs per nucleotide (Lynch and Marinov, 2015). Trypanosomatids lack the purine *de novo* biosynthetic pathway (Berens et al., 1981) and therefore rely on the purine salvage pathway by import of appropriate nitrogenous bases to be used as precursors for the synthesis (Davies et al., 1983). In addition, trypanosomatids can synthesize pyrimidines from glutamine and aspartate, both present in the culture medium HMI-9. So far, there is no evidence that it can import thymidine or thymine (reviewed in Tiwari and Dubey, 2018). Based on the metabolic pathways predicted from the *T. brucei* genome for purine salvage and pyrimidines biosynthesis we calculated the ATP cost for the biosynthesis of each nucleotide (Table 1), starting from the precursors available in the culture medium: hypoxanthine (for purine salvage) and glutamine and aspartate (for the *de novo* synthesis of pyrimidines). The direct costs of making the other metabolites required in these pathways were also included (Supplementary Tables S2, S3 and S4). On average, *T. brucei* spends 11.5 ATP molecules for the biosynthesis of one purine and 9 ATPs for the biosynthesis of one pyrimidine (Table 1). The *T. brucei* haploid genome has an approximate size of 35 Mbp (TriTrypDB; <https://tritrypdb.org/tritrypdb/app>) and consists of 11 megabase chromosomes, a few intermediate chromosomes, and hundreds of minichromosomes (Berriman et al., 2005). Given the cost of each dNTP and the GC content of the *T. brucei* genome, the estimated total cost of the synthesis of the necessary number of dNTPs for the entire diploid genome duplication in one cell cycle is then  $1.4 \times 10^9$  ATPs.

Table 1. ATP cost for the synthesis of deoxyribonucleotides for *T. brucei* genome duplication



| dNTP         | ATP cost | % of the genome | Total cost                          |
|--------------|----------|-----------------|-------------------------------------|
| dCTP         | 12       | 22.8            | $3.8 \times 10^8$                   |
| dTTP         | 6        | 27.2            | $2.3 \times 10^8$                   |
| dATP         | 11       | 27.2            | $4.2 \times 10^8$                   |
| dGTP         | 12       | 22.8            | $3.8 \times 10^8$                   |
| <b>Total</b> |          |                 | <b><math>1.4 \times 10^9</math></b> |

Other costs involved in genome duplication were estimated. First, there is the cost of the unwinding of the double-helix of the DNA. Using the yeast value, where this process costs one ATP per nucleotide (Ramanagoudr-Bhojappa et al., 2013), in *T. brucei* it will require  $7 \times 10^7$  ATPs in total. Next, some ATP is needed for the synthesis of the small RNA primers (~10 nt) necessary for the initiation of nucleotide polymerization during duplication of the lagging strand of DNA, which involves the formation of the Okasaki fragments. The number of the necessary RNA primers depends on the number of the origins of replication (ORI) and the size of the intervals between them. In yeast, the length of the Okasaki fragment is ~165 nt, with 10 nt corresponding to the RNA primer (Smith and Whitehouse, 2012). Taking that: i. the haploid genome has 35 Mb; ii. the lagging strand during DNA replication is fully replicated based on the synthesis of Okasaki fragments; and iii. that each Okasaki fragment has a length of ~165 nt, the total number of Okasaki fragments needed for the genome replication can be obtained from the ratio between the genome size and the length of the Okasaki fragment. The obtained value indicates that  $4.2 \times 10^5$  is the minimum number of RNA primers necessary to produce the Okasaki fragments necessary to duplicate the whole diploid genome. The average cost of rNTP synthesis in *T. brucei* is 5 ATPs per unit (see below). Therefore, the costs associated with RNA primer synthesis are  $2.1 \times 10^7$  ATPs. After the synthesis of Okasaki fragments, DNA ligase uses 2 ATPs to ligate each pair of fragments, which then costs  $8.4 \times 10^5$  ATPs in this parasite. Last, there is an ATP cost associated with the assembly of the polymerase-containing sliding clamp. On average, 3 ATPs per complex are necessary (Majka et al., 2004). Since duplication of the lagging strand requires one sliding clamp per fragment to be synthesized, *T. brucei* requires approximately  $1.3 \times 10^6$  ATPs in this step. As a whole, the contribution of these processes to the total cost is minor when compared to the cost of nucleotide synthesis (Table 2).

Table 2. Summary of ATP costs associated with nuclear and mitochondrial genome duplication (maxicircles and minicircles) of *T. brucei*

| Process                    | ATP cost                      |                             |                              |
|----------------------------|-------------------------------|-----------------------------|------------------------------|
|                            | Nuclear genome                | Maxicircles                 | Minicircles                  |
| dNTP synthesis             | 1,400 x 10 <sup>6</sup>       | 6.9 x 10 <sup>6</sup>       | 60 x 10 <sup>6</sup>         |
| DNA unwinding              | 70 x 10 <sup>6</sup>          | 0.69 x 10 <sup>6</sup>      | 6 x 10 <sup>6</sup>          |
| RNA primer synthesis       | 21 x 10 <sup>6</sup>          | 0.21 x 10 <sup>6</sup>      | 1.8 x 10 <sup>6</sup>        |
| Okasaki fragments ligation | 0.84 x 10 <sup>6</sup>        | 0.0084 x 10 <sup>6</sup>    | 0.073 x 10 <sup>6</sup>      |
| Sliding clamp assembly     | 1.3 x 10 <sup>6</sup>         | 0.012 x 10 <sup>6</sup>     | 0.11 x 10 <sup>6</sup>       |
| Opening of ORIs            | negligible                    | negligible                  | 0.12 x 10 <sup>6</sup>       |
| Total                      | <b>1,493 x 10<sup>6</sup></b> | <b>7.8 x 10<sup>6</sup></b> | <b>68.1 x 10<sup>6</sup></b> |

There is still a series of costs that is too small to be relevant to the total cost of genome duplication. One example is the ATP investment associated with opening the ORIs. It has been estimated as being at least 20 ATPs per ORI (Lynch and Marinov, 2015). In *T. brucei*, there is a minimum number of 33 ORIs necessary to replicate the 11 megabase chromosomes (da Silva et al., 2020), which adds at least 1,320 ATP molecules per S-phase of the cell cycle. Additionally, *T. brucei* has at least 6 intermediate-sized chromosomes and about 50-100 minichromosomes (Melville et al., 2000). Assuming that there is at least one ORI per intermediate and minichromosome, there will be an additional requirement of about 620 to 2,120 ATP molecules. Other costs such as for proofreading, DNA repair, and epigenetic modifications are still to be fully elucidated. The total cost for the nuclear genome duplication is estimated as being 1.49 x 10<sup>9</sup> ATP molecules.

### The cost of kDNA duplication

The mitochondrial genome of *T. brucei* is contained in a unique structure called kinetoplast. The DNA present in the kinetoplast (kDNA) consists of a concatenated network of two classes of circular DNA: the maxicircles (~23 kb) and minicircles (~1 kb). Maxicircles are

present in a low-copy number (~30 per cell) and encode proteins of the mitoribosomes, some of the proteins of the complexes of the respiratory chain, and two rRNAs. Remarkably, most of these genes in maxicircles are encrypted and need to undergo RNA editing before translation. The RNA editing process is mediated by guide RNAs (gRNAs) that are transcribed from the minicircles. There are approximately 6,000 minicircles per cell with at least 391 different sequences encoding different gRNAs (Cooper et al., 2019). Because of the intricate nature of the kDNA, the process of its duplication is rather complex. On one hand, minicircles are released from the core of the network, unwound, duplicated and then reassembled back in the periphery of the network. On the other hand, maxicircles are duplicated inside the network, but the exact mechanism is still unknown (reviewed in Verner et al., 2015).

As has been described for genome replication, dozens of proteins participate in kDNA duplication, including helicases, topoisomerases, polymerases, primases and ligases (reviewed in Jensen and Englund, 2012). As the same classes of proteins are involved in both processes, we assumed similar costs for the initiation of each replication unit to those estimated for the nuclear genome duplication. Therefore, we used the rationale and estimations described in the previous section: (i) DNA unwinding, which costs 1 ATP per nucleotide, resulting in  $0.69 \times 10^6$  ATPs for maxi- and  $6 \times 10^6$  ATPs for minicircle duplication; (ii) RNA primer synthesis costs 50 ATPs per primer, resulting in  $0.21 \times 10^6$  ATPs for maxi- and  $1.8 \times 10^6$  ATPs for minicircles; (iii) Okasaki fragments ligation costs 2 ATP per ligation resulting in  $0.0084 \times 10^6$  ATPs for maxi- and  $0.073 \times 10^6$  ATPs for minicircles; and (iv) sliding clamp assembly which costs 3 ATPs on average, resulting in  $0.012 \times 10^6$  ATPs for maxi- and  $0.11 \times 10^6$  ATPs for minicircles (Table 2).

Some peculiarities regarding the kDNA and its replication required an adjustment in the calculations. First, although the sequence of kDNA is mostly known, the distribution of the 391 types of minicircles varies from 1 to 144 copies per cell (Cooper et al., 2019). This makes the accurate GC-content hard to estimate. For this reason, we assumed a 50% CG content and an average synthesis cost of 10 ATPs per nucleotide. Thus, the cost of the dNTPs for maxicircle duplication is  $6.9 \times 10^6$  ATPs and  $60 \times 10^6$  ATPs for minicircle

duplication. Second, according to the calculations made for nuclear genome DNA replication, the cost for opening the origins of replication is 20 ATPs per ORI. We have previously considered this cost negligible due to the low number of ORIs necessary to duplicate the whole nuclear genome. Although this number is still negligible for the duplication of maxicircles (~600 ATPs), due to the number of minicircles (20 ATPs per ORI for 6,000 ORIs), this cost becomes more relevant for their duplication, and it totalizes  $0.12 \times 10^6$  ATP molecules (Table 2). The duplication of the mitochondrial genome (maxicircles and minicircles) costs  $0.0759 \times 10^9$  ATP molecules. In total, duplicating both the nuclear and the mitochondrial genome requires an estimated  $1.57 \times 10^9$  ATP molecules.

### **The cost of transcription of the nuclear genome**

In *T. brucei* BSF, RNA Pol I transcribes the gene arrays for ribosomal RNAs (rRNAs) and a telomeric expression site containing a single variant surface glycoprotein (VSGs) gene. This specific gene comes out of a very large repertoire of which one VSG is expressed at a given time. However, together with this VSG gene, a set of genes called Expression Site Associated Genes (ESAGs) are transcribed that lie upstream of the VSG gene (Bernards et al., 1985; Johnson et al., 1987; Kooter et al., 1987). Most of them encode proteins with still unknown biological function. RNA Pol II transcribes all other protein-coding genes as well as the genes for a spliced leader (SL) RNA, whilst RNA Pol III transcribes genes encoding snRNAs, tRNAs, and 5S RNAs (Gilinger and Bellofatto, 2001; Günzl et al., 2003). In trypanosomatids, genes are organized in tandem arrays which are transcribed in a polycistronic manner. The resulting long precursor RNAs are processed by trans-splicing and polyadenylation. Consequently, mature individual mRNAs containing a 39 nt SL with a 5' cap and a 3' poly-A tail are produced (Jäger et al., 2007). It means that, differently from organisms that regulate transcription initiation and termination of each gene, trypanosomatids transcribe coding genes that are not needed in a specific condition (*e.g.* the tandemly arranged genes encoding PGKA, B and C are all transcribed simultaneously, but B or C is degraded depending on the life-cycle stage (Gibson et al., 1988; Haanstra et al., 2008; Osinga et al., 1985), as well as intergenic regions and then degrade them once the mature mRNAs are formed.

Regarding the ATP costs of transcription, we estimated the ATP costs for synthesis of an entire set of transcripts and the ATP costs associated with their maintenance (turnover). For that purpose, we used most of the data and assumptions used for the model developed by Haanstra and collaborators for different aspects of BSF *T. brucei* gene expression (Haanstra et al., 2008). In this paper they also report values and estimations for numbers and half-lives of four types of RNAs: i. rRNAs; ii. RNAs encoding VSGs; iii. mRNAs; iv. SL-RNAs (Table 3). For the ATP expenditure calculation, we considered the cost of synthesis of the rNTPs to be used as monomers, the cost of each polymerization reaction, and the steady-state number of molecules of each RNA-type produced per cell ( $N$ ) and the average length of the mature RNA ( $L$ ).

Table 3. Data from Haanstra et al., 2008 used in this work.

| Process                      | rRNA     | VSG mRNA | Total other mRNA | SL RNA |
|------------------------------|----------|----------|------------------|--------|
| Number of molecules per cell | 125,000  | 1,000    | 19,000           | 20,000 |
| Half-life                    | 12 h     | 45 min   | 30 min           | 30 min |
| Transcript length*           | 8,550 nt | 1,720 nt | 2,800 nt         | 141 nt |
| Mature transcript length     | 6,100 nt | 1,720 nt | 2,200 nt         | 39 nt  |

\*The value for the transcript VSG 117 was mistyped in Haanstra et al. (2008) and is corrected here on the basis of Boothroyd et al., 1982.

*Synthesis of the transcriptome:* The production cost of the nucleotides is on average 5 ATPs per rNTP (Table 4, Supplementary Table S3). The total synthesis cost for the four RNA populations is  $5NL$ . Therefore, the resulting ATP cost for the (Lynch and Marinov, 2015) rRNA population is  $3.8 \times 10^9$ , for the VSG mRNAs  $8.6 \times 10^6$ , for the set of other mRNAs  $2.1 \times 10^8$  and for SL RNA synthesis  $3.5 \times 10^6$  per cell cycle (Table 5).

Table 4. ATP cost for the synthesis of ribonucleotides

| rNTP | ATP cost |
|------|----------|
| CTP  | 5        |
| UTP  | 4        |

|     |   |
|-----|---|
| ATP | 5 |
| GTP | 6 |

364

365

366 *Maintenance of the transcriptome (turnover):* Assuming that ribonucleotides are efficiently  
367 recycled, the cost invested in recharging the rRMPs to rRTPs is 2 ATPs (Lynch and  
368 Marinov, 2015). Considering the half-lives ( $t_{1/2}$ ) of each set of RNAs, the maintenance cost  
369 is the cost of replacing the RNAs degraded during the cell cycle. Given the doubling time  
370 of BSF *T. brucei*, here taken as 5.3 hours (see above) and the half-life of each set of RNA,  
371 we calculated the number of RNA molecules of each class that must be resynthesized  
372 during a cell cycle for replacement ( $N_r$ ) as being 32,965 for rRNAs, 993 for VSG mRNAs,  
373 18,988 for every other mRNA and 19,987 for the SLs. Hence, as we considered a complete  
374 recycling of the ribonucleotides obtained from the RNA degradation (NMPs), the cost for  
375 maintaining the whole transcriptome is the cost of recharging the nucleotides to be  
376 polymerized. For each RNA subset we calculated the cost as  $2N_rL$ . According to this, the  
377 total cost for the maintenance of each type of RNA is  $40 \times 10^7$  for rRNAs and  $0.34 \times 10^7$   
378 ATPs for VSG mRNAs, whereas the maintenance of the remaining set of mRNAs costs  $8.3$   
379  $\times 10^7$  ATPs, and the cost calculated for SL-RNA is  $0.14 \times 10^7$  ATPs (Table 5).

380

381 *Polymerization of rNTPs of intergenic regions:* As the intergenic regions are transcribed  
382 and degraded to monomers after RNA processing, we considered that the ribonucleotides  
383 used in the transcription of intergenic regions are efficiently recycled. However, the cost  
384 invested in polymerizing the ribonucleotides of the intergenic regions must be estimated.  
385 For this purpose, we used the difference in length between the whole precursor and the  
386 mature transcripts and applied the same calculations for synthesis and maintenance for the  
387 polymerization costs (Haanstra et al. 2008). For the VSG transcripts, the whole transcript  
388 length is considered as being the same of the mature transcript length (Boothroyd et al.,  
389 1982; Haanstra et al., 2008). However, VSG genes are transcribed together with the ESAGs  
390 in a polycistronic manner in one out of the about 15 telomeric bloodstream expression sites  
391 (BES) that is activated. Therefore, we calculated the total length of the intergenic regions of  
392 the polycistron. For this, we used data from the BES 40 containing the VSG 221 gene

(Müller et al., 2018). The whole BES's length is 59.78 kb. It contains 18 protein-coding sequences including the VSG with a total added size of 25.15 kb. For the estimation of the UTR regions (which also constitute the mature RNA) we used the median length of 130 nt for the 5'UTR and 399 nt for the 3' UTR (Michaeli, 2011) except for the VSG, where we considered the whole size of 1,720 nt (Boothroyd et al., 1982; Haanstra et al., 2008). So, the total length of the polycistron that is maintained as mRNA is 34.44 kb. Therefore, the intergenic regions that are transcribed and further degraded are estimated as being 25.34 kb long. Applying the same calculations for synthesis and maintenance for the polymerization used above, we estimated the total cost of intergenic transcription for VSG/ESAGs, rRNA, mRNAs of other proteins, and SL RNA as being  $18 \times 10^7$ ,  $166 \times 10^7$ ,  $8 \times 10^7$  and  $1.47 \times 10^7$  ATPs, respectively, per cell cycle (Table 5).

*Nucleosome displacement:* Another cost associated with transcription is related to the displacement of the nucleosomes. This process involves various histone posttranslational modifications (Stillman, 2018). *T. brucei* expresses four out of five canonical eukaryotic variants of histones (H2A, H2B, H3, and H4) and they work as boundaries for polycistronic units (Lowell et al., 2005; Siegel et al., 2009). The length of DNA wrapped around each nucleosome is ~147 nt and the length of the strands linking two nucleosomes is ~43 nt in *T. brucei* (Hecker et al., 1989). Considering these numbers and the total DNA length, the number of nucleosomes can be estimated as being  $3.7 \times 10^5$  per diploid genome. Assuming a minimum cost of 30 ATPs per set of modifications in one nucleosome (Lynch and Marinov, 2015) and that once the chromatin is open for transcription it remains in this state, the minimum cost of displacing the nucleosome barriers during transcription is  $1.1 \times 10^6$  ATPs per cell cycle (Table 5).

*Splicing:* By far the major part of the mRNA maturing process occurs by trans-splicing (with only two exceptions reported (Siegel et al., 2010)). In trans-splicing, similarly to cis-splicing, two transesterification reactions unite two RNA fragments (reviewed in Michaeli, 2011). Cis-splicing costs at least 10 ATPs per intron (Lynch and Marinov, 2015; Matera and Wang, 2014) and here we consider the same cost for trans-splicing. Considering the



synthesis and maintenance of mRNA levels, the cost of trans-splicing is  $1.06 \times 10^6$  ATPs per cell cycle (Table 5).

In summary, transcription costs  $\sim 1.1 \times 10^{10}$  ATP molecules. Costs associated with other aspects of transcription such as the formation of the transcriptional complexes are too small or have not been completely elucidated and therefore are not considered here. In eukaryotes, RNA polymerase II transcription initiates with the recruitment of the polymerase to the promoter region by multiple transcription factors. Subsequently, the DNA helix is unwound, forming an open complex (OC). These processes cost at least 20 ATPs per OC (Lynch and Marinov, 2015; Wang et al., 1992; Yan and Gralla, 1997). Because of the polycistronic transcription, fewer OCs are necessary to initiate transcription in trypanosomatids, making these costs negligible to the total transcriptional cost. Similarly, transcriptional termination is likely to be less costly in trypanosomatids, since it happens at transcription termination sites marked by histone variant H3.V and base J, a modified thymine detected in the nuclear DNA of trypanosomatids and related protists grouped in the Euglenozoa clade (Reynolds et al., 2016; Schulz et al., 2016). Additionally, some transcriptional costs have not been completely elucidated. For example, phosphorylation of the C-terminal domain of RNA Pol II regulates different aspects of transcription (Hsin and Manley, 2012). However, the number of phosphorylation events per transcriptional cycle in trypanosomatids has not been determined yet. Another process related to transcription of which exact costs remain unknown is RNA nuclear export. Interestingly, although this process is ATP dependent in opisthokonts (Folkmann et al., 2011), the lack of many ATPases in the nuclear pore complex of trypanosomatids suggests that mRNA nuclear export is GTP driven in these organisms (Obado et al., 2016). Regardless of the case, these costs remain to be determined.

Table 5. Summary of ATP costs associated with transcription per cell cycle of *T. brucei*

| Process    | ATP cost           |
|------------|--------------------|
| rRNA       | $420 \times 10^7$  |
| VSG mRNA   | $1.2 \times 10^7$  |
| other mRNA | $29.3 \times 10^7$ |

|                                   |                                        |
|-----------------------------------|----------------------------------------|
| SL RNA                            | $0.49 \times 10^7$                     |
| nucleosome displacement           | $0.12 \times 10^7$                     |
| polymerization intergenic regions | $193.47 \times 10^7$                   |
| trans-splicing                    | $0.11 \times 10^7$                     |
| <b>Total</b>                      | <b><math>644.69 \times 10^7</math></b> |

450

## 451 **The costs of transcription of kDNA**

452

453 The maxicircles of the kDNA code for 2 rRNAs and 18 proteins (Kirby et al., 2016). It is  
 454 currently accepted that, similarly to what happens in the trypanosomatid nucleus and  
 455 mitochondria of other organisms, transcription of the maxicircles is polycistronic and that  
 456 the long pre-RNAs are processed at both ends to generate mature RNAs (Gazestani et al.,  
 457 2018; Koslowsky and Yahampath, 1997). However, it has been recently proposed that this  
 458 transcription might be gene-specific and promoter-regulated (Aphasizheva et al., 2020;  
 459 Sement et al., 2018). Additionally, 12 of these genes, named cryptogenes, need to undergo  
 460 further processing by RNA editing to generate translation-competent mRNAs. This editing  
 461 consists of the insertion and/or deletion of uridines and is mediated by gRNAs transcribed  
 462 from the minicircles present in the kDNA (reviewed in Read et al., 2016). Once transcribed,  
 463 these gRNAs are also processed by 3'-5' trimming and U-tailing and stabilized by their  
 464 ligation to the RNA-editing substrate-binding complex (RESC) (reviewed in Aphasizheva  
 465 et al., 2020). Multiple gRNAs are necessary for the editing of a single maxicircle-encoded  
 466 mRNA (Koslowsky et al., 2014).

467 To estimate the minimal cost of kDNA transcription, and due to the lack of data on the  
 468 number of kDNA transcripts per BSF cell and their half-lives, we assumed that maxicircle  
 469 transcription has similar dynamics to that of nuclear transcription. Noteworthy, most of the  
 470 mtDNA genes are developmentally regulated but, in the model of polycistronic  
 471 transcription, this regulation is likely to be posttranscriptional (Gazestani et al., 2018).  
 472 Thus, considering a similar ratio of the number of transcripts/genes to the nucleus, and the  
 473 number of maxicircles (~30) present in the kDNA, we estimated an average of 480

molecules of mRNA and 35,700 molecules of rRNA per BSF mitochondrion. The average length of the mature fully-edited mitochondrial rRNAs and mRNAs was considered to be 880 nt and 933 nt, respectively (Kirby et al., 2016). With a cost of 5 ATPs for the synthesis of each rNTP (Table 4), efficient recycling of the ribonucleotides once the RNAs are degraded, 2 ATPs for recharging each monomer (Lynch and Marinov, 2015), and similar half-lives to those RNAs encoded by the nuclear genome, we calculated that  $17.3 \times 10^7$  and  $0.3 \times 10^7$  ATP molecules are necessary to synthesize the estimated pool of mitochondrial rRNAs and mRNAs, respectively. In the polycistronic model of transcription, intergenic regions are transcribed and, after RNA processing, the rNTPs are recycled. For that reason, it is necessary to estimate the polymerization cost of the intergenic regions of the polycistrons transcribed from the maxicircles. Given the size of each maxicircle (~23 kb) and the sum of the average length of mature RNAs (18,554 nt) we considered that 4,446 nt are polymerized for each maxicircle, resulting in a consumption of  $\sim 2.7 \times 10^5$  ATP molecules.

To have a more complete estimation of the total transcriptional cost of the mitochondrial genome, it is necessary to estimate the cost of the transcription of gRNAs. Transcription of the minicircles generates an 800 nt precursor (Aphasizhev and Aphasizheva, 2011), encoding 2-5 gRNAs each, with an average length of 49 nt (Cooper et al., 2022). It means that, on average, for each minicircle, 678 rNTPs are polymerized and then recycled after processing. Considering the number of 6,000 minicircles per cell (Cooper et al., 2019) and that at least one of each gRNA will be transcribed, the minimal cost for minicircles transcription is the cost of the polymerization of the rNTPs of the intergenic regions, which is  $\sim 0.8 \times 10^7$  ATP molecules, plus the cost of synthesis and polymerization of the rNTPs in the mature gRNAs, which is  $\sim 0.4 \times 10^7$  ATP molecules. Thus, transcription of the minicircles costs, at minimum,  $1.2 \times 10^7$  ATPs per cell cycle.

Assuming that the transcription of maxicircles has a similar global dynamic as that of nuclear transcription, and that each minicircle is only transcribed once per life cycle, we calculated the cost of transcription of the mitochondrial genome at  $18.8 \times 10^7$  ATP molecules. It is worth mentioning that these are likely underestimations due to the scarce

knowledge of the ATP expenditure of each process involved in kDNA transcription, pre-RNA processing and mRNA editing.

Table 6. Summary of ATP costs per cell cycle associated with kDNA transcription

| Process                              | Maxicircles                          | Minicircles                         |
|--------------------------------------|--------------------------------------|-------------------------------------|
| Transcription                        | $17.6 \times 10^7$                   | $0.4 \times 10^7$                   |
| Polymerization of intergenic regions | $0.03 \times 10^7$                   | $0.8 \times 10^7$                   |
| <b>Total</b>                         | <b><math>17.6 \times 10^7</math></b> | <b><math>1.2 \times 10^7</math></b> |

### Energy expenditure for proteome synthesis, maintenance, degradation

Regarding the biosynthesis of proteins, we must take into account the cost of obtaining their components, the amino acids. For this, we consider two sources for these metabolites: their uptake from the environment, and their biosynthesis *de novo*. The present work is based on data obtained by culturing the parasites in a very rich medium containing all the amino acids, so in this condition, and probably also *in vivo* in the bloodstream, it is reasonable to assume that most of their requirements are fulfilled through their acquisition from the extracellular medium. However, we made also an estimation of the cost of the *de novo* synthesis for those amino acids having their biosynthetic pathways predicted from the genome sequence as this estimation could be of general interest (see Supplementary Text 1).

To determine how much ATP is spent by BSF *T. brucei* on protein synthesis, we first estimated the number of amino acids present in its proteome from the cell's known volume and the calculated protein density. The volume of *T. brucei* BSF (1K1N, *i.e.* one kDNA network and one nucleus, after cell division, before DNA replication) cells is  $\sim 45 \mu\text{m}^3$  (Rotureau et al., 2011). According to the method proposed by Milo (2013), we calculated the number of proteins per cell based on the protein mass per unit volume ( $c_p$ ) in g of protein per ml of cell volume, which has been estimated for several cell types as being 0.2 g/ml (Albe et al., 1990; Milo, 2013). Other relevant parameters taken into account are the average length of proteins ( $l_{aa}$ ) (300 amino acids according to Milo and Phillips, 2015), and

the average molecular mass of amino acids ( $m_{aa}$ ) (110 Da). Therefore, the average mass of proteins per unit volume ( $N/V$ ) is:

$$N/V = c_p / l_{aa} \times m_{aa} = 6.1 \text{ } \mu\text{g/ml (Milo, 2013).}$$

For converting these values into the number of proteins per  $\mu\text{m}^3$ , we applied the following equation:

$$N/V = (c_p \times N_A \times 10^{-12} \text{ ml}/\mu\text{m}^3) / l_{aa} \times m_{aa}$$

where  $N_A$  is Avogadro's number. The obtained value is  $3.5 \times 10^6$  proteins/ $\mu\text{m}^3$ . Therefore, considering a cell volume of  $45 \text{ } \mu\text{m}^3$  we obtained a number of proteins per cell of  $157.5 \times 10^6$ .

With an average protein length of 300 amino acids (Milo and Phillips, 2015), we then calculated that a single cell contains  $4.7 \times 10^{10}$  amino acids as protein components (in other words, forming peptide bonds). The direct cost of polymerization is 4 ATPs per amino acid (Mahmoudabadi et al., 2019), so the direct cost of translation, for a single cell, is about  $\sim 1.9 \times 10^{11}$  ATPs to double the entire set of proteins (Table 7).

During the BSF trypanosome's cell cycle, part of its proteins has to be degraded and replaced by new proteins to be synthesized. The balance between these processes represents the cell's protein turnover. Its cost must be added to that of the entire proteome doubling during the parasite's growth and division. We considered for our calculations only regulated protein degradation, which requires an expenditure of 100 – 200 ATP molecules per degraded protein (Lynch and Marinov, 2015; Peth et al., 2013). Here we assumed an average value of 150 ATPs per degraded protein. A proteomic turnover study determined that this process is directly influenced by the duration of the cell cycle. For this, the duration of BSF trypanosomes life cycle was determined as being 11.85 h. This remarkable difference with the duration considered in our study can be explained by the fact that the authors performed this estimation for parasites growing under protein labelling conditions (data were obtained using SILAC labeling for proteomics). Under these conditions, the estimated a half-life for the entire proteome was 5.6 h (Tinti et al., 2019). As we are using, in this work, the duration of the BSF cell cycle of 5.3 h, we made an estimation of energy

cost of the proteome's turnover in our model by scaling the half-life using the rationale described in Tinti et al. The obtained value for the proteome half-life was then 2.56 h, meaning that, according to the exponential decay law, during an entire cell cycle 0.76% of the proteome is degraded. Therefore,  $1.2 \times 10^8$  proteins per cell are degraded during a cell cycle, at an average cost of  $1.8 \times 10^{10}$  ATP molecules (Table 7). At the same time, to maintain the entire proteome, the same quantity of these proteins must be newly synthesized at a cost of  $1.4 \times 10^{11}$  (Table 7). This, added to the synthesis of an extra new proteins for obtaining an entire proteome for each daughter cell, requires  $3.3 \times 10^{11}$  ATP molecules per cell cycle for protein synthesis. In summary, the total cost for degradation, resynthesizing and doubling of the proteome is  $\sim 3.5 \times 10^{11}$  ATP molecules (Table 7).

Table 7. Summary of ATP costs associated with protein synthesis and degradation during a cell cycle of BSF *T. brucei*

| Process             | ATP cost                                |
|---------------------|-----------------------------------------|
| Proteome doubling   | $1.9 \times 10^{11}$                    |
| Protein degradation | $0.18 \times 10^{10}$                   |
| Protein resynthesis | $1.4 \times 10^{11}$                    |
| <b>Total</b>        | <b><math>3.48 \times 10^{11}</math></b> |

# **Energy cost of sugar nucleotides used in the synthesis of the VSG coat**

In the BSF of *T. brucei*, the major surface protein is the VSG, which is highly glycosylated. The VSG polypeptide is estimated as being present in  $10^7$  copies per cell, representing approximately 90% of cell surface polypeptides and 10% of total cellular protein content (Grünfelder et al., 2002). Therefore, the sugar nucleotides used in the synthesis of the VSGs require by far the major part of the ATP dedicated to the synthesis of the entire pool of sugar nucleotides in these cells. Trypanosomatids' survival, infectiousness, and virulence in their mammalian hosts are directly influenced by their cell surface glycoconjugates. The amount of sugar nucleotide used for their synthesis was calculated based on previous estimates (Turnock and Ferguson, 2007). For this, certain conditions were assumed: i) the

metabolites are evenly distributed throughout the cell volume; ii) the demand for each sugar nucleotide is minimal and for this calculation we did take into account the glycoconjugates turnover; iii) the contributions of low-abundance glycoconjugates are considered negligible; and iv) an average glucidic composition of Man<sub>15</sub>GlcNAc/GlcN<sub>5.5</sub>Galp<sub>5</sub> (Grünfelder et al., 2002), based on that of VSG variant 221 (MITat 1.2). On these bases, we estimated the need for  $5 \times 10^7$  UDP-Galp, and the same quantity of UDP-GlcNAc. Also,  $15 \times 10^7$  units of GDP-Man are required. Considering an average ATP expenditure of 4 HEBs (high-energy bonds) per nucleotide sugar, the total ATP requirement for synthesizing the glucidic moieties of  $10^7$  VSGs is  $\sim 1 \times 10^9$  ATP molecules per cell during a cell cycle (Table 8).

Table 8. Estimation of ATP cost for the synthesis of sugar nucleotides for *T. brucei* VSGs per cell cycle

| Sugar Nucleotide | HEBs per molecule | SN in VSG | HEB per SN   | HEB per cell                      |
|------------------|-------------------|-----------|--------------|-----------------------------------|
| UDP-Galp         | 4                 | 5         | 20           | $2 \times 10^8$                   |
| UDP-GlcNAc       | 4                 | 5         | 20           | $2 \times 10^8$                   |
| GDP-Man          | 4                 | 15        | 60           | $6 \times 10^8$                   |
|                  |                   |           | <b>Total</b> | <b><math>1 \times 10^9</math></b> |

## Energy expenditure for doubling the lipidome of *T. brucei* BSF

One of the basic needs for cell proliferation is the production of a new set of lipids for synthesizing the external and internal membranes. However, we have not found in the literature an estimate of the total energy cost necessary for doubling the total cell membrane content. BSF *T. brucei* can obtain its lipids by two different routes (Paul et al., 2001; Poudyal and Paul, 2022): either from the mammalian host plasma, mainly by receptor-mediated endocytosis of LDL particles (Coppens et al., 1995) or by *de novo* synthesis. The contribution of both routes may vary dependent on external conditions. A calculation of the cost of lipid acquisition by uptake from the host is an integral part of the estimation of the total cost of the formation of endocytic vesicles described below. Given that *T. brucei*'s total pool of phospholipids and sterols (Guan and Mäser, 2017; Patnaik et al., 1993;



Richmond et al., 2010), as well as their biosynthesis pathways (Dawoody Nejad et al., 2020; Gibellini et al., 2008; Lee et al., 2006; Lilley et al., 2014) have been characterized in detail, it allowed us to estimate the energy requirements when doubling of the lipidome content of BSF trypanosomes would entirely occur by *de novo* routes. For this purpose, we considered the number of HEBs used in the biosynthetic pathways of each species of phospholipid and ergosterol. With this information, we were able to estimate the amount of ATP needed for their doubling (Table 9).

Table 9. Lipid composition and energy cost of biosynthesis for each molecular species in BSF of *T. brucei*.

| Species                 | %mol  | [Conc]<br>(nmol.<br>mg <sup>-1</sup> ) | Number of<br>HEB for<br>biosynthesis | nmol <sub>HEB</sub><br>ug prot | nmol <sub>HEB</sub><br>per<br>parasite | ATP<br>molecules<br>per<br>parasite |
|-------------------------|-------|----------------------------------------|--------------------------------------|--------------------------------|----------------------------------------|-------------------------------------|
| PC                      | 47.8  | 171.6                                  | 4                                    | 686.4                          | 6.86 x 10 <sup>-6</sup>                | 4.1 x 10 <sup>9</sup>               |
| PE                      | 20.7  | 74.313                                 | 4                                    | 297.252                        | 2.97 x 10 <sup>-6</sup>                | 1.8 x 10 <sup>9</sup>               |
| PI                      | 5.4   | 19.386                                 | 4                                    | 77.544                         | 7.75 x 10 <sup>-7</sup>                | 4.7 x 10 <sup>8</sup>               |
| PS                      | 3     | 10.77                                  | 4                                    | 43.08                          | 4.31 x 10 <sup>-7</sup>                | 2.6 x 10 <sup>8</sup>               |
| CL <sup>1</sup>         | 0.715 | 2.56                                   | 8                                    | 20.48                          | 2.05 x 10 <sup>-7</sup>                | 1.2 x 10 <sup>8</sup>               |
| PG <sup>1</sup>         | 0.485 | 1.74                                   | 4                                    | 6.96                           | 6.96 x 10 <sup>-8</sup>                | 4.2 x 10 <sup>7</sup>               |
| Ergosterol <sub>2</sub> | 13.8  | 49.54                                  | 12                                   | 594.48                         | 5.94 x 10 <sup>-6</sup>                | 3.6 x 10 <sup>9</sup>               |
| SM                      | 14.5  | 52.055                                 | 4 (5 for IPC<br>or EPC)              | 247.7                          | 2.48 x 10 <sup>-6</sup>                | 1.5 x 10 <sup>9</sup>               |
| <b>Total</b>            |       |                                        |                                      |                                | <b>1.97 x 10<sup>-5</sup></b>          | <b>1.19x10<sup>10</sup></b>         |

PC, phosphatidylcholine; PE, phosphatidylethanolamine; PI, phosphatidylinositol; PS, phosphatidylserine; CL, cardiolipin; PG, phosphatidylglycerol SM, sphingomyelin. <sup>1</sup> Based on the molar fraction of PG/CL found in the procyclic form; <sup>2</sup> compositions were observed in neutral fractions. E.U., Elementary Units.

The total amount of ATP consumed during the life cycle of *T. brucei*, for the entire lipidome doubling (which includes the cost of membrane doubling) is 1.19 x 10<sup>10</sup> ATP molecules. Noteworthy, among the costs calculated (Table 9), the species that are most

energy demanding are ergosterol (36%), PC (31.6%), PE (13.7%) and SM (12%), respectively.

## Energy expenditure on polyphosphate synthesis

Polyphosphates (polyP) are linear polymers of a few to many hundreds of inorganic phosphate (Pi) residues linked by HEBs. They are arbitrarily divided into two forms: short-chain (SC, from 3 to ~300 Pi) and long-chain (LC, from 300 to ~1000 Pi), based on the method used for their extraction (Moreno and Docampo, 2013). In trypanosomatids, the polyP has been proposed to be associated with several biological functions, such as osmoregulation (Docampo et al., 2010),  $\text{Ca}^{2+}$  signaling (Lander et al., 2016) and energy source storage (Docampo et al., 2010). Most polyPs in trypanosomatids are concentrated in acidocalcisomes (Docampo et al., 2010), although polyP has also been found in the nucleus, cytosol and glycosomes. However, in BSF, polyPs have been detected mostly in acidocalcisomes and glycosomes (Negreiros et al., 2018). PolyP is very abundant in BSF: 600  $\mu\text{M}$  for LC and 250  $\mu\text{M}$  for SC for  $2 \times 10^7$  parasites (Lemercier et al., 2004). As the amount of polyP is measured by the molarity of phosphate units, these concentrations correspond to the number of monomers in the polymerized inorganic phosphates (Cordeiro et al., 2019). So, we consider LC+SC as the total concentration of polyP corresponding to 850  $\mu\text{M}$  for the extraction from  $2 \times 10^7$  parasites. Based on a cellular volume of 45  $\mu\text{m}^3$  per individual cell, we obtained a total volume of 0.9  $\mu\text{L}$  for  $2 \times 10^7$  BSF cells. The 850  $\mu\text{M}$  of Pi polymerized in polyP in 0.9  $\mu\text{L}$  corresponds to  $765 \times 10^{-12}$  mol for  $2 \times 10^7$  parasites. As each Pi corresponds to one HEB, which is equivalent to one ATP molecule, the total ATP required to synthesize the BSF's whole content of polyP is  $3.8 \times 10^{-17}$  mol of ATP, in other words,  $2.3 \times 10^7$  ATP molecules per parasite. Knocking out the Vacuolar Transporter Chaperone 4 in *T. brucei* caused a decrease of 25% of the total polyP (Lander et al., 2013). As BSF are not challenged by strong osmolarity or nutritional variations (the main processes in which polyP are spent) (Lander et al., 2013), we assume that this is the global rate of polyP degradation. During a cell cycle, BSF has to synthesize at least a new set of polyP for replication and renew the 25% of the polyP stock. Thus, the total ATP demand

for synthesizing a new set of polyPs and maintaining the existing one is  $2.9 \times 10^7$  molecules. Additionally, Lander et al. (2013) showed that each Pi translocated into the acidocalcisomes requires the consumption of one ATP molecule (Lander et al., 2013). However, the transport of small molecules such as Pi into the glycosomes is not expected to have any cost since low molecular mass molecules and ions can freely diffuse through pores in the glycosomal membrane (Gualdron-López et al., 2012). Considering these facts, and that almost all polyP is stored in acidocalcisomes (Docampo et al., 2010; Negreiros et al., 2018), we can calculate the number of ATP molecules to transport into these organelles the Pi units needed for polyP polymerization. This implies the same number of Pi units imported into the acidocalcisomes as those used for polymerization, which doubles the budget resulting in total consumption of  $5.8 \times 10^7$  ATP molecules per cell cycle.

### **Vitamins and other micronutrients**

Trypanosomes also need vitamins and other micronutrients whose biosynthetic processes and/or uptake require ATP. Mechanisms for uptake from the medium have been identified for choline (Macêdo et al., 2013), pyridoxine (vitamin B6) (Gray, 1995) and riboflavin (vitamin B2) (Balcazar et al., 2017). Ascorbic acid (vitamin C) biosynthesis has been identified in *T. brucei*, with the last step taking place within glycosomes (Wilkinson et al., 2005). Vitamin B1 is especially interesting because it is not efficiently taken up under physiological conditions suggesting that its intracellular levels must be obtained via biosynthesis (Stoffel et al., 2006). Overall, considering the nutrients mentioned above, there is still much to be elucidated. Although there is evidence that biosynthesis occurs for some vitamins, such as B1 and B6, the pathways themselves are not understood in detail (Gray, 1995; Stoffel et al., 2006). All works referenced in this section that identified an uptake mechanism for nutrients describe passive processes. Even if some of these compounds are biosynthesized, most of them are produced in low quantities. In summary, there is no evidence that these processes impact ATP levels meaningfully. Our conclusion for now, with some reservations, is that vitamin transport and biosynthesis do not have a significant impact on the energy budget of the parasite.

## ATP requirement for transmembrane transport

The cellular uptake of molecules and ions is part of the cell maintenance processes, and in most cases, it has an energy cost (Lynch and Marinov, 2017). The energy dedicated to cell maintenance includes a contribution necessary for preserving a homeostatic ionic composition (Stouthamer and Bettenhausen, 1973). The energy demand by the uptake of amino acids, ammonium, potassium ions and inorganic phosphate from the extracellular medium into the cell was previously estimated for the synthesis of a new microbial cell, *in casu Escherichia coli* (Stouthamer, 1973). To obtain a value for the energy demand of BSF transport processes, we used the calculations made by Stouthamer as a model (Table 10). Stouthamer assumed that 0.5 moles of ATP are necessary for the uptake of 1 mole of  $\text{NH}_4^+$ , and 1 mole of ATP is necessary for the uptake of 1 mole of  $\text{Pi}$ , any amino acid, acetate or malate. For  $\text{Na}^+$  and  $\text{K}^+$  data are available for BSF *T. brucei*, allowing us to make a quite accurate calculation, and the cost of moving them across the plasma membrane was estimated separately (see below). It is worth mentioning that Stouthamer did not consider the costs of taking up glucose, which could be relevant for many prokaryotes but not for *T. brucei* where glucose transport happens by facilitated diffusion (J Gruenberg et al., 1978; ter Kuile and Opperdoes, 1991b). For *E. coli*, depending on the culture conditions, between 18.3 and 19.4% of the total energy required for a cell formation is needed only for overall solutes uptake (Stouthamer, 1973). Due to the lack of other data, we considered that BSF *T. brucei* uses an intermediate percentage of its total ATP budget for solutes uptake (18.9%), representing  $\sim 1.1 \times 10^{11}$  ATP/ cell cycle x cell. For the calculation of costs of the transport of  $\text{Na}^+$  and  $\text{K}^+$ , we used data previously obtained (Bridges et al., 2008; Nolan and Voorheis, 2000). Considering that the ouabain-sensitive BSF  $\text{Na}^+/\text{K}^+$  ATPase has a specific activity for ATP hydrolysis of  $\sim 1.17$  nmoles/min x mg (equivalent to  $\sim 1.17$  nmoles/min x  $10^8$  cells (Opperdoes et al., 1984)) and that ATP is hydrolyzed into ADP +  $\text{Pi}$  with the concomitant exchange of 3  $\text{Na}^+$  for 2  $\text{K}^+$ , we calculated that a continuous activity of this pump during 5.3 hours would result in an ATP cost of  $2.2 \times 10^5$  ATP molecules per cell during an entire cell cycle. This value is negligible when compared to the total cost of transport of other ions and metabolites. Additionally,  $\text{H}^+$ -ATPase is important to regulate the intracellular pH of BSF *T. brucei* and an approximate value of 534 nmol/min x mg protein was reported for the  $\text{H}^+$  efflux (Vanderheyden et al., 2000). Taking account of this

value and the Stouthamer assumptions, we estimated that  $\sim 1.02 \times 10^{10}$  ATP molecules are necessary for the  $H^+$  efflux per cell during an entire cell cycle. Regarding  $Ca^{2+}$  efflux, proteins with homology to PMCA-type  $Ca^{2+}$ -ATPases were identified and reported in *T. brucei* as TbPMC1 and TbPMC2 (Luo et al., 2004). In particular, TbPMC1 has been located in the plasma membrane of BSF. However, no information is available regarding its ATP consumption. Even so, we suggest that compared with the values estimated by Luo et al., the ATP expenditure for  $Ca^{2+}$  efflux could be negligible when compared to the total cost of transport in the parasite. Based on these calculations, the estimated ATP costs for transport of solutes across the plasma membrane were estimated as being  $\sim 1.2 \times 10^{11}$  ATP/cell cycle x cell.

Table 10. ATP requirement for the formation of microbial cells from glucose and inorganic salts and the influence of the addition of amino acids (AA) or/and nucleic acid bases (bases). (Modified from Stouthamer, 1973).

| Ion/Metabolite | ATP<br>required<br>(moles x $10^{-4}$<br>/ g cells) | % of the total | ATP required<br>(moles x $10^{-4}$ /<br>g cells) | % of the total |
|----------------|-----------------------------------------------------|----------------|--------------------------------------------------|----------------|
|                | AA                                                  | AA             | AA + bases                                       | AA + bases     |
| $NH_4^+$       | 10.4                                                | 3.0            | 0.0                                              | 0.0            |
| Amino acids    | 47.9                                                | 13.7           | 47.9                                             | 15.3           |
| Phosphate ions | 7.7                                                 | 2.2            | 7.7                                              | 2.5            |
| <b>Total</b>   | <b>66</b>                                           | <b>18.9</b>    | <b>55.6</b>                                      | <b>17.7</b>    |

## The cost of motility

Motility due to beating of its single flagellum serves the trypanosome to navigate the environment. But for BSF *T. brucei* it has the important additional role of counteracting the defense of the infected host, as it enables clearance of host antibodies attached to VSGs by causing these surface coat proteins to be recycled (Engstler et al., 2007). As a curiosity, the name *Trypanosoma* is derived from the Greek word describing the peculiar movement of these cells (auger cells) (Shimogawa et al., 2018). Trypanosomes are vigorous swimmers,

and the swimming velocity depends on the microenvironment's viscosity. They can reach a speed of at least 20  $\mu\text{m/s}$ , allowing the hydrodynamic removal of attached host antibodies (Heddergott et al., 2012). The frequency of flagellar beating has been measured as 15-20 Hz (Stellamanns et al., 2014). Considering that the resultant energy during the breakdown of 1 ATP molecule is  $5.064 \times 10^{-20}$  J and that the power generated by a flagellar beating is  $\sim 4 \times 10^{-17}$  J, one flagellar beating results from the consumption of at least 790 ATP molecules. If we assume that the ATP hydrolysis for flagellar motility is constant, based on the speed maintenance (output) and on the fact that trypanosomes are non-stopping engines, the total ATP consumed can be calculated as:

$$\text{ATP}_f = F \times n \times t$$

where  $\text{ATP}_f$  is the amount of ATP consumed by the flagellar movement during the entire BSF cell cycle,  $F$  is the frequency of flagellar beating (the average value of 17.5 Hz was taken for this calculation),  $n$  is the number of ATP molecules consumed per flagellar beating and  $t$  is the duration of the cell cycle in seconds. This calculation points out that permanent flagellar beating consumes  $2.6 \times 10^8$  ATP molecules per cell per cell cycle. This calculation does not take into account the specific characteristics of the internal flagellar machinery, which is responsible for transducing the energy obtained from ATP breakdown into flagellar beating. Inside a flagellum, the axoneme is constituted by 96 nm dynein repeats, forming two central double microtubules surrounded by nine other pairs of microtubules ( $9(2) + 2$ ) (Ralston and Hill, 2008). The basic dynein composition of each repeat is five outer arms (two-headed) and seven single-headed inner arms of dyneins (Imhof et al., 2019). Each dynein head has an AAA-ATPase domain (Trott et al., 2018), so in total, the axoneme has 17 ATPase domains at each 96 nm dynein repeat. As there are  $2 \times 9$  microtubules in a flagellum, there are a total of 306 ATPase domains/repeat. The average length of a BSF flagellum is 25.3  $\mu\text{m}$  (Imhof et al., 2019), so dividing it by 96 nm, it is possible to calculate that a *T. brucei* flagellum has approximately 264 repeats with  $\sim 40,392$  dynein molecules. However, not all components of the flagellar machinery work at the same time. In order to generate a planar waveform, only some of the doublets are activated simultaneously, and the activity should switch periodically between two nearly-opposed

doublets (Chen et al., 2015). Considering that each beat is nearly planar in *T. brucei* BSF, instead of more than 40,392 dyneins operating at the same time, there will be those corresponding to 2 out of 9 pairs working simultaneously, in other words, 8,976 active dynein molecules per beat. To estimate the ATP consumption based on the dynein number, it must be considered that every single conformational change in dynein is driven by the formation of an ATP-dynein complex, which is before the power stroke. The power stroke is the motor force that drives the sliding displacement on the longitudinal axis of an axoneme (Lin et al., 2014). The product of axonemal diameter and the shear angle (defined as the interior angle between the symmetry axis of the dynein head and the line tangent to the axoneme, immediately after the first bend), gives the total sliding displacement along an axoneme between two neighboring doublets (Brokaw, 1989; Chen et al., 2015). For *Chlamydomonas*, it was established that the shear angle is  $\sim 1$  rad. The diameter of an axoneme is  $\sim 150$  nm (Bastin et al., 2000; Höög et al., 2014; Koyfman et al., 2011). The dynein sliding displacement has been calculated as being 8 nm (Lin et al., 2014). As a result, we have the ratio between the sliding displacement and the dynein power stroke, which results in 19 steps per flagellar beat. Assuming that each dynein takes 1 ATP per step, 8,976 of the dynein molecules being active at a given time, and that a flagellar beat needs 19 dynein steps along the microtubules, the parasite has to invest  $\sim 1.7 \times 10^5$  ATP molecules per flagellar beat. As previously stated, the average frequency for flagellar beating is 17.5 Hz. Remaking the calculation above with data from the mechanistic analysis of the flagellar machinery (see equation above) the ATP demand by the whole flagellar machinery would be equivalent to  $5.7 \times 10^{10}$  molecules.

#### **ATP cost of activation and recruitment of vesicles**

Endocytosis is a very important biological process in *T. brucei*, to capture specific compounds from the environment, such as low-density lipoprotein containing lipids and transferrin providing iron by the receptor-mediated process and serum proteins like albumin complexed with various molecules by fluid-phase endocytosis (Coppens et al., 1995, 1988; Kariuki et al., 2019). However, the mechanisms involved in this process have still not been fully described in this parasite (Link et al., 2021). The process is also crucial for the above-



mentioned antibody clearance and VSG recycling which allows the trypanosome to escape from the host immune attack (Manna et al., 2014). BSF possesses at least  $10^7$  VSG molecules per cell and recycles the entire VSG coat each 12 min (Engstler et al., 2007). To recycle VSGs, *T. brucei* depends on both endocytic and exocytic pathways. The VSGs are returned to the surface after passing through endosomes where any attached antibodies are removed and routed to the lysosomes for degradation. As every endocytic event in *T. brucei*, it depends on clathrin. For that, the cell produces 6-7 clathrin-coated vesicles bearing VSGs per second (Engstler et al., 2004). For our calculation, we used the minimum value of 6 clathrin-coated vesicles bearing VSGs per second, which implies that these cells would be internalizing 21,600 vesicles per hour. Vesicle formation for VSG recycling is a Rab11-dependent process (Grünfelder et al., 2003). Considering that the cell produces 21,600 vesicles per hour and at least 1 Rab assembly is necessary for each vesicle, the energy cost for the activation and recruitment of vesicles based on the assembly of Rab proteins (that use 1 GTP/Rab) results in a cost of  $1.14 \times 10^5$  GTP molecules per cell cycle. In this calculation, we are not taking into account some other processes that could impact endocytosis-related ATP consumption in *T. brucei*. Even though the endocytosis process is quite well understood in other organisms such as several opisthokonts (Adung'a et al., 2013), we are not able to estimate other ATP expenditures that can contribute to the total cost of endocytosis in *T. brucei* due to the low conservation of components for this machinery. For example, during the formation of the vesicles, several proteins are recruited to the site of membrane bending, and an actin bridge is built up (Paraan et al., 2020). The assembly of these proteins and the actin polymerization surrounding the vesicle involves ATP and GTP hydrolysis and/or cycling. For cargo translocation along tubulin microtubules, cycling of GTP is also necessary (Kaksonen and Roux, 2018). Clathrin and adaptor protein release also depends on ATPase activity (Hannan et al., 1998). Therefore, the minimal amount of ATP consumed for this process, considering a rate of conversion of 1 ATP per GTP is  $1.14 \times 10^5$  ATP molecules per cell cycle.

**How much ATP hydrolysis is required to maintain the mitochondrial inner membrane potential ( $\Delta\Psi_m$ )?**

The single mitochondrion of BSF *T. brucei* displays marked differences when compared to those of every other eukaryote described so far, and even when compared to that of other life cycle stages of the parasite, such as the procyclic form. The most remarkable differences are: i) the absence of OxPhos; ii) a marked reduction in the expression levels of proton pumping respiratory enzyme complexes; and iii) a drastic reduction in the expression of TCA cycle enzymes (Zíková et al., 2017). As the mitochondrial integrity and biogenesis depends on the mitochondrial inner membrane potential ( $\Delta\Psi_m$ ) (Brown et al., 2006; Schnauffer et al., 2005), BSF compensates for the lack of functional respiratory proton pumps by using the  $F_1F_o$ -ATP-synthase in reverse mode. In this way,  $\Delta\Psi_m$  is built up and maintained by pumping protons into the intermembrane space by hydrolysis of ATP (Brown et al., 2006). Additionally, the cells require intramitochondrial ATP to prevent inhibition of the trypanosome alternative oxidase, which is needed to use oxygen as a terminal electron acceptor (Luévano-Martínez et al., 2020). It must be noted that the ATP required in the mitochondrial matrix to keep both systems working does not necessarily depend on ATP import by the adenine nucleotide carrier. In the absence of this transporter's activity, it can also rely on an intramitochondrial substrate-level phosphorylation system, comprising the acetate:succinate CoA transferase and the succinyl-CoA synthetase (ASCT/SCS) cycle. This is reminiscent to the substrate-level phosphorylation and reversal of the ATP-synthase shown in other systems such as the isolated liver and heart rabbit mitochondria (Chinopoulos et al., 2010). Such a system has been demonstrated as being functional in BSF in terms of intramitochondrial ATP production (Jenkins et al., 1988). We hypothesize that this mitochondrial substrate-level phosphorylation system is the main source of intra-mitochondrial ATP, and it can provide sufficient ATP to maintain the  $\Delta\Psi_m$  (Millerioux et al., 2012; Mochizuki et al., 2020), despite its relatively low capacity for producing only small quantities of ATP (Michels et al., 2021). In terms of energy expenditure, the mitochondrial substrate-level phosphorylation could then be considered energetically neutral since all ATP produced by the ASCT/SCS cycle is devoted to the maintenance of the mitochondrial membrane potential generated by the  $F_1F_o$ -ATP synthase.

## Discussion

Long-slender bloodstream forms of *T. brucei* have a unique configuration in terms of the bioenergetic pathways responsible for ATP production. Despite having a mitochondrion, these cells rely almost exclusively on glycolysis for ATP production, and they are the only case in nature (to the best of our knowledge) of mitochondriated cells having a mitochondrion that, under the conditions studied thus far, does not contribute to the cell's net ATP production. Even more, their ATP synthase hydrolyzes ATP to maintain the mitochondrial inner membrane potential (Nolan and Voorheis, 1992; Panicucci et al., 2017; Schnauffer et al., 2005). Based on data available in the literature on glycolytic flux during proliferation (Haanstra et al., 2012), we calculated with some precision the total amount of ATP produced during a BSF cell cycle, in other words, we calculated the ATP necessary for maintaining alive a BSF trypanosome and building a new one ( $\sim 6 \times 10^{11}$  molecules) when cultured in the rich medium HMI-9 medium. There is not much information available on the ATP necessary for the survival and replication of other cell types. In fact, to the best of our knowledge, such numbers have been reported so far only for two other eukaryotic cells and two prokaryotic cells. When our numbers are compared with those of the other cells (Table 11) it becomes clear that, as expected, the ATP produced per cell during a cell cycle is much lower than that for mammalian cells. However, it should be noted that, equally expected, this value is much higher than that obtained for prokaryotic cells.

Table 11. ATP produced during the cell cycle in different cells

| Organism                           | Total                       | Reference                                     |
|------------------------------------|-----------------------------|-----------------------------------------------|
| <i>Mycoplasma pneumoniae</i>       | $4.3 \times 10^9$           | (Wodke et al., 2013)                          |
| <i>Escherichia coli</i>            | $5.9\text{-}12 \times 10^9$ | (Farmer and Jones, 1976;<br>Stouthamer, 1973) |
| BSF <i>Trypanosoma brucei</i>      | $5.94 \times 10^{11}$       | This work                                     |
| Mammalian tissue culture cell iBMK | $1.2 \times 10^{13}$        | (Fan et al., 2013)                            |
| Human fibroblast                   | $4.5 \times 10^{13}$        | (Flamholz et al., 2014)                       |

Once knowing how much ATP is available for keeping alive and replicate a cell, it was interesting to analyze how much of this valuable resource is used for critical biological processes (Figure 1, Supplementary Table S5). The cost of DNA replication depends, in addition to the genome size, on the nucleotide composition and the specific ATP cost of their biosynthesis. Whilst in other organisms the average cost spent on dNTP biosynthesis from glucose is 50 ATP molecules (Lynch and Marinov, 2015), in *T. brucei* BSF it is only 10 ATP molecules. This is due to the fact that this parasite does not synthesize purines *de novo* but uses the salvage pathway, and synthesizes pyrimidines from externally supplied glutamine and aspartate. According to our calculations, 90% of the costs of the total DNA duplication is the cost of replicating the nuclear genome, while the remaining 10% corresponds to the cost of replicating the kDNA. Differently from replication, transcription costs are strongly influenced by other factors. Large polycistronic units are often assumed as costly because they involve the transcription of “useless” DNA (for example intergenic sequences, developmentally regulated genes, pseudogenes, *etc.*) that must be further eliminated during the trans-splicing processing for producing the mature mRNA, or post-transcriptional degradation. However, according to our calculations, a significant part of the cost of transcription is due to the biosynthesis of rNTPs. As rNTP used in transcribing the intergenic regions can be recycled they would not constitute an extra cost (Lynch and Marinov, 2015). So, the only extra cost that can be assumed is that of their polymerization (equivalent to 2 ATP/base). Considering this, the extra cost of polycistronic transcription is ~30% of the total transcriptional cost, in other words, 0.3% of the total budget for maintaining and building a new cell. There are not enough data to calculate in detail the total extra cost of transcribing coding sequences that must be further degraded in order to control gene expression. However, some estimations can be made based on the fact that only 47 out of 9,694 (~0.5%) genes are considered as not being expressed in BSF, and 772 out of 9,694 (8%) genes are considered down-regulated in BSF when compared to procyclic forms (Naguleswaran et al., 2018). Considering the extreme case in which both gene populations are completely degraded after polymerization, the spurious coding RNA polymerization corresponds to 8.5% of the total coding RNAs. As we considered 2 ATP molecules being spent per base polymerized, an average transcript length of 2,800 nt, and an average RNA synthesis of 1.2 RNAs/h (estimated in Haanstra et al., 2008) the estimated

ATP expenditure is  $\sim 2.9 \times 10^7$  ATP molecules (0.5% of the total ATP expenditure for the completion of a cell cycle) (Figure 1, Supplementary Table S5). These values can be compared with those that can be estimated from a scenario of having transcriptional regulation for each protein-encoding gene. Considering that BSF expresses 8,875 genes this implies the formation of at least an equivalent number of transcriptional OCs, instead of the reduced number of OCs necessary in the polycistronic transcription system. Based on an individual cost of 20 ATP molecules/OC, the total cost of individual transcriptional initiation would be  $1.7 \times 10^5$  ATPs, a much higher value when compared to the  $\sim 1 \times 10^4$  ATPs required for OCs in the polycistronic transcription. Regardless of the case, both costs seem to be largely negligible concerning the total transcription cost and therefore from a purely energetic point of view the evolutionary advantage of individual transcription seems to be impactless.

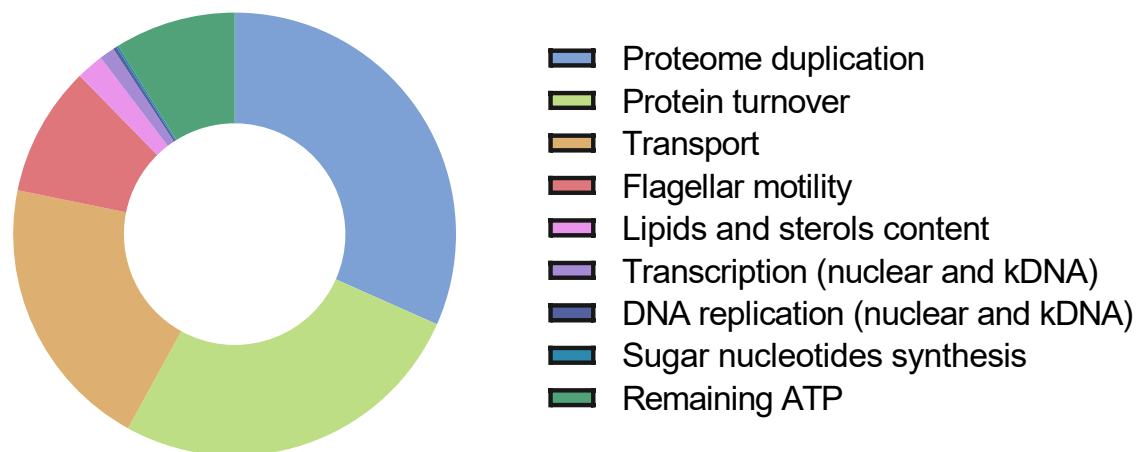

**Figure 1.** Summary of the most energetically costly biological processes in bloodstream form *T. brucei*. For underlying values see text and Supplementary Table S5.

As reported for several cell types, the synthesis and maintenance of the proteome is the most expensive process during a cell cycle (Supplementary Table 5 and Table 12). Despite the fact that BSF trypanosomes take up most of the amino acids from the medium instead of *de novo* synthesizing them, they are, according to our calculations, not an exception with regard to the expensiveness of proteome production and maintenance. This is explainable because the formation of peptide bonds is one of the costliest biochemical reactions in a

cell (4 ATP molecules per bond). Therefore, taken together, translation and protein turnover demand 58.6% of the ATP budget (Figure 1). An interesting point emerges when analysing the cost of synthesizing the amino acids that compose the proteome in comparison with the energy required to import them from the environment. According to Mahmoudabadi, the average cost of synthesizing 1 amino acid is 2 ATPs (Mahmoudabadi et al., 2019). We are assuming that during proteome turnover all amino acids are recycled. Thus, cost of synthesizing will only be considered for amino acids to be used for building a new proteome (not for the maintenance due to turnover). We estimated that the synthesis of a new proteome demands  $4.7 \times 10^{10}$  amino acids. Therefore, the cost of synthesizing all amino acids would be  $9.4 \times 10^{10}$  ATPs. Herein we assumed that the total cost of uptake of amino acids and ions was as estimated by Stouthamer for *E. coli* (between 13.7 and 15.3% of the total cell ATP budget). Taking the intermediate value of 14.5%, this would result in an ATP cost of  $8.6 \times 10^{10}$ , surprisingly very close to the cost estimated for amino acid biosynthesis. It is generally assumed that taking metabolites up is energetically more efficient than synthesizing them, and this efficiency would contribute to the parasitic lifestyle. Our calculations show that, in principle, for amino acids, the difference is very minor, impacting the total budget by less than 1.5%. These calculations do not include the cost of the synthesis of sugar nucleotides used for the glycosylation of surface proteins (mostly VSGs). Even being part of the total cost of building an entirely new proteome, it represents a negligible 0.5% of the total ATP demanded by this process.

Table 12. Comparison of ATP demand in different cell types

| Process                      | ATP demand (%)                      |                                                                        |                                                    |
|------------------------------|-------------------------------------|------------------------------------------------------------------------|----------------------------------------------------|
|                              | BSF <i>T. brucei</i><br>(This work) | Bacteria (Russell<br>and Cook, 1995;<br>Stouthamer, 1973) <sup>a</sup> | Mammalian cells<br>(Buttgereit and<br>Brand, 1995) |
| DNA replication              | 0.3                                 | 1.8                                                                    | 25 <sup>c</sup>                                    |
| Transcription                | 1.1                                 | 11.8 <sup>b</sup>                                                      |                                                    |
| Proteome doubling            | 31.7                                | 59.3 <sup>d</sup>                                                      | 34 <sup>d</sup>                                    |
| Protein turnover             | 26.3                                |                                                                        |                                                    |
| Sugar nucleotides synthesis  | 0.2                                 | ND                                                                     | ND                                                 |
| Lipids and sterols synthesis | 2                                   | 0.3                                                                    | ND                                                 |

|                                                   |      |      |                 |
|---------------------------------------------------|------|------|-----------------|
| polyP synthesis and maintenance                   | 0    | ND   | ND              |
| Transport (aa, K <sup>+</sup> , Pi <sup>-</sup> ) | 20.2 | 18.1 | 33 <sup>e</sup> |
| Flagellar motility                                | 9.5  | ND   | ND              |
| Activation/recruitment of vesicles                | 0    | ND   | ND              |

<sup>a</sup> Bacteria grown in the presence of glucose, inorganic salts and amino acids

<sup>b</sup> Sum of RNA synthesis and turnover

<sup>c</sup> Sum of DNA/RNA synthesis

<sup>d</sup> Reference refers only to protein synthesis

<sup>e</sup> Sum of Na<sup>+</sup>/K<sup>+</sup> and Ca<sup>2+</sup> ATPases

ND, not determined

Regarding the cost of synthesizing the lipidome, it is interesting to note that BSF trypanosomes contain most of the lipids commonly present in eukaryotic cells (Carroll and McCrorie, 1986). Although BSF *T. brucei* can acquire most of the lipids from the blood of the mammalian host (Coppens et al., 1988), they have also the ability to rely on complete *de novo* biosynthesis of phospholipids and glycolipids to fulfill the need of some specific lipids (van Hellemond and Tielens, 2006). For example, the VSG synthesis and anchoring in the plasma membrane requires high quantities of myristate, which is at low abundance in the host serum (Buxbaum et al., 1996). As most of the lipids biosynthesis pathways have been characterized in detail for *T. brucei* (Dawoody Nejad et al., 2020; Gibellini et al., 2008; Lee et al., 2006; Lilley et al., 2014), we could estimate that the synthesis of the complete repertoire of lipids and sterols would consume 2% of the total ATP budget (Table 12, Figure 1). However, this value is likely to be an overestimation, since data indicate a balance between transport and biosynthesis is responsible for the maintenance of the lipids content in BSF *T. brucei* (Poudyal and Paul, 2022).

PolyPs are ubiquitously distributed among bacteria, protists and mammalian cells, and in unicellular eukaryotes have been proposed to have a role in different biological processes such as adaptation to stress, osmoregulation and metabolism regulation. In prokaryotes, they have been proposed as storage of HEBs. Indeed, their hydrolysis involves the



possibility of being coupled to phosphorylating ADP to ATP. However, based on our calculations, a role for polyPs as an energy reservoir seems unlikely. In BSF trypanosomes, polyPs are synthesized inside acidocalcisomes, which necessitates the import of Pi units into this organelle, an ATP-demanding process. According to our calculations, this implies the expenditure of 2 ATP molecules per unit of Pi polymerized, in other words, the polymerization requires at least twice the energy that can be retrieved by hydrolysis. This, together with the fact that the total energy stored in the form of polyPs is less than 0.005% of the total ATP produced during a cell cycle (Supplementary Table S6) suggest that their use as an energy reserve could only be restricted to very specific processes.

Regarding the costs of critical processes for survival and replication of BSF not related to the maintenance and duplication of biomass, we estimated the costs of motility, endo/exocytic vesicles formation, and the maintenance of the mitochondrial inner-membrane potential (which in the case of BSF is exclusively dependent on ATP hydrolysis). Motility occurs as a non-stop process during the entire cell cycle and is associated with the activity of the flagellar machinery. Two calculations were made on the basis of data available in the literature: i. based on the energy dissipated by the flagellar beating; and ii. based on the ATP demand of the flagellar structure, relying on the information on the composition and organization of the molecular motors responsible for the flagellar movement. Both calculations resulted in values differing in two orders of magnitude. It must be noted that both values refer to different phenomena since in the first case we estimated the energy output and in the second case the energy demand of the entire flagellar machinery. Therefore, if both values are correct, the efficiency of the machinery for flagellar beating can be calculated as the percentual ratio between the energy output and input, in this case approximately 0.5%. In this sense, it should be pointed out that Stellamanns et al. (2014) found a discrepancy between the power necessary to move the BSF body in relation to that actually produced by the flagellar movement in the range of one order of magnitude (Stellamanns et al., 2014). Whatever the case, the low efficiency of this process in terms of trypanosome motility is in agreement with the fact that flagellar beating is necessary for other processes not necessarily related to parasite movement, such as VSG recycling for antibody clearance (Engstler et al., 2007; Stellamanns et al., 2014). To estimate the total percentage of the budget used for flagellar beating, we considered the

highest value obtained, which resulted in the consumption of 9.6% of ATP produced (Figure 1). Regarding the VSG recycling and antibody clearance, they require, in addition to flagellar movement, the formation of vesicles for trafficking the surface proteins through the cell interior. Due to the fact that the ATP (or in some cases GTP) requirements of these processes are largely unknown, we did not consider the cost of formation of the actin bridge, the cargo translocation along tubulin microtubules, and the clathrin and adaptor protein release (Hannan et al., 1998). Therefore, the ATP cost in our calculation is probably underestimated. However, as it represents less than approximately 0.0001%, the whole process is likely to be energetically undemanding.

In this paper, we reported our calculation of the energy budget of maintaining alive and building up a BSF cell of *T. brucei* during its cell cycle based on the cellular and metabolic processes known to occur in these trypanosomes and data available about the ATP costs of the processes. Where relevant data for *T. brucei* were lacking, we estimated the costs based on data known for other organisms. Of course, the outcome of this endeavour is an approximation; for several processes in the trypanosomes, or even in general in cells, quantitative information is not available and/or how much ATP is required to sustain them is unknown. Nonetheless, the approximation seems realistic; all known major processes have been considered. Our analysis provided results that are amenable for experimental interrogation, while it also revealed where more research is required to allow an even more complete understanding of the energy expenditure of trypanosomes. Moreover, it will be interesting to expand this study to the analysis of other proliferative life-cycle stages of *T. brucei*, or those of related parasitic (*e.g.* the intracellular *T. cruzi* amastigote) and free-living organisms for which sufficient data are or may become available in the foreseeable future.

## Materials and Methods

### Databases

Table 13. Databases used in this work

| Database   | Web address                                                                                                 | Reference             |
|------------|-------------------------------------------------------------------------------------------------------------|-----------------------|
| TriTrypDB  | <a href="https://tritrypdb.org/tritrypdb/app">https://tritrypdb.org/tritrypdb/app</a>                       | (Aslett et al., 2010) |
| Bionumbers | <a href="https://bionumbers.hms.harvard.edu/search.aspx">https://bionumbers.hms.harvard.edu/search.aspx</a> | (Milo et al., 2010)   |

1034

## 1035 **Methods**

1036 (1) Our analysis is restricted to long-slender proliferating forms of BSF *T. brucei*. For their  
 1037 energy supply, these trypanosomes are entirely dependent on glucose uptake from the  
 1038 blood. Almost all glucose is converted to pyruvate, which is excreted, resulting in a yield  
 1039 of 2 ATP/glucose consumed. We have based our calculations on the quantitative analysis  
 1040 of the glucose consumption rate in exponentially growing trypanosomes of *T. brucei* strain  
 1041 Lister 427 with a doubling time of 5.3 h, as described by Haanstra et al., 2012. All  
 1042 calculations for rates of ATP consumption in different processes and activities of  
 1043 trypanosomes as described in the literature have been scaled to a cell cycle of 5.3 h.

1044 (2) ATP consumption for biosynthetic processes has been calculated taking into  
 1045 account the (macro)molecular content (proteins, nucleic acids, lipids) of the trypanosomes,  
 1046 the known precursors which are either synthesized or taken up from the host environment,  
 1047 the rate of the processes and the turnover of the (macro)molecules. Also, the energy of  
 1048 uptake of processes was considered.

1049 (3) Other energy costs that were estimated involved: biogenesis of subcellular  
 1050 structures, endocytosis and recycling of the VSG surface coat, motility, protein  
 1051 degradation, and generation and maintenance of transmembrane electrochemical ion  
 1052 gradients.

## 1053 **Detailed costs considered for each biological process:**

1054 Genome duplication: synthesis of deoxyribonucleotides, DNA unwinding, synthesis and  
 1055 ligation of Okasaki fragments and sliding clamp assembly.

1056 Transcription: synthesis and polymerization of ribonucleotides, transcript length and half-  
 1057 life (rRNA, VSG, mRNA and SL RNA), nucleosome displacement, splicing.

1058 Proteome maintenance: amino acid polymerization, protein half-life and degradation

1059 Membrane doubling: synthesis of phospholipids and ergosterol

1060 Synthesis of sugar nucleotides: average glucidic composition

1061 Synthesis of polyphosphates: synthesis of short-chain and long-chain polyP, polyP  
 1062 translocation

1063 Transmembrane transport: transport of ions and amino acids

1064 Cell motility: flagellar beating, dynein sliding displacement and power stroke

1065 Activation and recruitment of vesicles: rate of vesicle formation, Rab assembly

1066 Maintenance of mitochondrial membrane potential: Fo-ATPase activity

1067 Information about some of the processes listed here is very complete. However, for some  
 1068 other processes in the trypanosome major gaps exists in our knowledge, while for still other  
 1069 ones very little information is available. Where possible, quantitative information was  
 1070 taken from other organisms, or assumptions have been made. Where this has been done, it  
 1071 is mentioned in the text and tables.

1072

1073 **Acknowledgements:** This work was supported by: Fundação de Amparo à Pesquisa do  
 1074 Estado de São Paulo (FAPESP) grants 2017/16553-0 and 2021/12938-0 (awarded to AMS),  
 1075 Conselho Nacional de Pesquisas Científicas e Tecnológicas (CNPq) grant 307487/2021-0  
 1076 (awarded to AMS) and Wellcome Trust grant 222986/Z/21/Z (awarded to JFN and AMS).  
 1077 ROOS, MBA, SM, AMM, FSD, RBMMG, LM, LLM and RWA are FAPESP fellows.

1078

1079 **Author Contributions:** JFN, ROOS, MBA, SM, AMM, FSD, RBMMG, LM, LLM,  
 1080 RWA, PAMM and AMS compiled, organized and analyzed the data, designed and

produced all tables and figures, and wrote essential parts of this manuscript. PAMM and AMS conceived the topic, scope and general organization of the manuscript. JFN, JHR, PAMM and AMS contributed to the revision and edition of the manuscript. PAMM and AMS made the final revision and edition. All authors approved the submitted version.

**Conflicts of Interest:** The authors declare no conflict of interest.

## References

- Adung'a VO, Gadelha C, Field MC. 2013. Proteomic analysis of clathrin interactions in trypanosomes reveals dynamic evolution of endocytosis. *Traffic* **14**:440–57. doi:10.1111/tra.12040
- Albe KR, Butler MH, Wright BE. 1990. Cellular concentrations of enzymes and their substrates. *J Theor Biol* **143**:163–195. doi:10.1016/S0022-5193(05)80266-8
- Aphasizhev R, Aphasizheva I. 2011. Mitochondrial RNA processing in trypanosomes. *Res Microbiol* **162**:655–663. doi:10.1016/j.resmic.2011.04.015
- Aphasizheva I, Alfonzo J, Carnes J, Cestari I, Cruz-Reyes J, Göringer HU, Hajduk S, Lukeš J, Madison-Antenucci S, Maslov DA, McDermott SM, Ochsenreiter T, Read LK, Salavati R, Schnauffer A, Schneider A, Simpson L, Stuart K, Yurchenko V, Zhou ZH, Ziková A, Zhang L, Zimmer S, Aphasizhev R. 2020. Lexis and grammar of mitochondrial RNA processing in trypanosomes. *Trends Parasitol* **36**:337–355. doi:10.1016/j.pt.2020.01.006
- Aslett M, Aurrecochea C, Berriman M, Brestelli J, Brunk BP, Carrington M, Depledge DP, Fischer S, Gajria B, Gao X, Gardner MJ, Gingle A, Grant G, Harb OS, Heiges M, Hertz-Fowler C, Houston R, Innamorato F, Iodice J, Kissinger JC, Kraemer E, Li W, Logan FJ, Miller JA, Mitra S, Myler PJ, Nayak V, Pennington C, Phan I, Pinney DF, Ramasamy G, Rogers MB, Roos DS, Ross C, Sivam D, Smith DF, Srinivasamoorthy G, Stoeckert CJ, Subramanian S, Thibodeau R, Tivey A, Treatman C, Velarde G, Wang H. 2010. TriTrypDB: a functional genomic resource for the Trypanosomatidae. *Nucleic Acids Res* **38**:D457–D462. doi:10.1093/nar/gkp851
- Balcazar DE, Vanrell MC, Romano PS, Pereira CA, Goldbaum FA, Bonomi HR, Carrillo C. 2017. The superfamily keeps growing: Identification in trypanosomatids of RibJ, the first riboflavin transporter family in protists. *PLoS Negl Trop Dis* **11**:e0005513. doi:10.1371/journal.pntd.0005513
- Bastin P, Pullen TJ, Moreira-Leite FF, Gull K. 2000. Inside and outside of the trypanosome flagellum: a multifunctional organelle. *Microbes Infect* **2**:1865–74. doi:10.1016/s1286-4579(00)01344-7

1116 Berens RL, Marr JJ, LaFon SW, Nelson DJ. 1981. Purine metabolism in *Trypanosoma*  
1117 *cruzi*. *Mol Biochem Parasitol* **3**:187–196. doi:10.1016/0166-6851(81)90049-9

1118 Bernards A, Kooter JM, Borst P. 1985. Structure and transcription of a telomeric surface  
1119 antigen gene of *Trypanosoma brucei*. *Mol Cell Biol* **5**:545–553.  
1120 doi:10.1128/mcb.5.3.545-553.1985

1121 Berriman M, Ghedin E, Hertz-Fowler C, Blandin G, Renauld H, Bartholomeu DC, Lennard  
1122 NJ, Caler E, Hamlin NE, Haas B, Böhme U, Hannick L, Aslett M a, Shallom J,  
1123 Marcello L, Hou L, Wickstead B, Alsmark UCM, Arrowsmith C, Atkin RJ, Barron  
1124 AJ, Brington F, Brooks K, Carrington M, Cherevach I, Chillingworth T-J, Churcher  
1125 C, Clark LN, Corton CH, Cronin A, Davies RM, Doggett J, Djikeng A, Feldblyum T,  
1126 Field MC, Fraser A, Goodhead I, Hance Z, Harper D, Harris BR, Hauser H, Hostetler  
1127 J, Ivens A, Jagels K, Johnson D, Johnson J, Jones K, Kerhornou AX, Koo H, Larke N,  
1128 Landfear S, Larkin C, Leech V, Line A, Lord A, Macleod A, Mooney PJ, Moule S,  
1129 Martin DM a, Morgan GW, Mungall K, Norbertczak H, Ormond D, Pai G, Peacock  
1130 CS, Peterson J, Quail M a, Rabbinowitsch E, Rajandream M-A, Reitter C, Salzberg  
1131 SL, Sanders M, Schobel S, Sharp S, Simmonds M, Simpson AJ, Tallon L, Turner  
1132 CMR, Tait A, Tivey AR, van Aken S, Walker D, Wanless D, Wang S, White B, White  
1133 O, Whitehead S, Woodward J, Wortman J, Adams MD, Embley TM, Gull K, Ullu E,  
1134 Barry JD, Fairlamb AH, Opperdoes F, Barrell BG, Donelson JE, Hall N, Fraser CM,  
1135 Melville SE, El-Sayed NM. 2005. The genome of the African trypanosome  
1136 *Trypanosoma brucei*. *Science* **309**:416–22. doi:10.1126/science.1112642

1137 Boothroyd JC, Paynter CA, Coleman SL, Cross GAM. 1982. Complete nucleotide  
1138 sequence of complementary DNA coding for a variant surface glycoprotein from  
1139 *Trypanosoma brucei*. *J Mol Biol* **157**:547–556. doi:10.1016/0022-2836(82)90475-2

1140 Bridges DJ, Pitt AR, Hanrahan O, Brennan K, Voorheis HP, Herzyk P, de Koning HP,  
1141 Burchmore RJS. 2008. Characterisation of the plasma membrane subproteome of  
1142 bloodstream form *Trypanosoma brucei*. *Proteomics* **8**:83–99.  
1143 doi:10.1002/pmic.200700607

1144 Brokaw CJ. 1989. Direct measurements of sliding between outer doublet microtubules in  
1145 swimming sperm flagella. *Science* **243**:1593–6. doi:10.1126/science.2928796

1146 Brown S v., Hosking P, Li J, Williams N. 2006. ATP synthase is responsible for  
1147 maintaining mitochondrial membrane potential in bloodstream form *Trypanosoma*  
1148 *brucei*. *Eukaryot Cell* **5**:45–53. doi:10.1128/EC.5.1.45-53.2006

1149 Buttgeriet F, Brand MD. 1995. A hierarchy of ATP-consuming processes in mammalian  
1150 cells. *Biochemical Journal* **312**:163–167. doi:10.1042/bj3120163

1151 Buxbaum LU, Milne KG, Werbovetz KA, Englund PT. 1996. Myristate exchange on the  
1152 *Trypanosoma brucei* variant surface glycoprotein. *Proceedings of the National*  
1153 *Academy of Sciences* **93**:1178–1183. doi:10.1073/pnas.93.3.1178

1154 Carroll M, McCrorie P. 1986. Lipid composition of bloodstream forms of *Trypanosoma*  
1155 *brucei brucei*. *Comparative Biochemistry and Physiology Part B: Comparative*  
1156 *Biochemistry* **83**:647–651. doi:10.1016/0305-0491(86)90312-3



1157 Chen DTN, Heymann M, Fraden S, Nicastro D, Dogic Z. 2015. ATP Consumption of  
1158 eukaryotic flagella measured at a single-cell level. *Biophys J* **109**:2562–2573.  
1159 doi:10.1016/j.bpj.2015.11.003

1160 Chinopoulos C, Gerencser AA, Mandi M, Mathe K, Töröcsik B, Doczi J, Turiak L, Kiss G,  
1161 Konrád C, Vajda S, Vereczki V, Oh RJ, Vizi VA. 2010. Forward operation of adenine  
1162 nucleotide translocase during  $F_0F_1$ -ATPase reversal: critical role of matrix  
1163 substrate-level phosphorylation. *The FASEB Journal* **24**:2405–2416.  
1164 doi:10.1096/fj.09-149898

1165 Cooper S, Wadsworth ES, Ochsenreiter T, Ivens A, Savill NJ, Schnauffer A. 2019.  
1166 Assembly and annotation of the mitochondrial minicircle genome of a differentiation-  
1167 competent strain of *Trypanosoma brucei*. *Nucleic Acids Res* **47**:11304–11325.  
1168 doi:10.1093/nar/gkz928

1169 Cooper S, Wadsworth ES, Schnauffer A, Savill NJ. 2022. Organization of minicircle  
1170 cassettes and guide RNA genes in *Trypanosoma brucei*. *Rna* **28**:972–992.  
1171 doi:10.1261/rna.079022.121

1172 Coppens I, Baudhuin P, Oppendoes FR, Courtoy PJ. 1988. Receptors for the host low  
1173 density lipoproteins on the hemoflagellate *Trypanosoma brucei*: purification and  
1174 involvement in the growth of the parasite. *Proceedings of the National Academy of*  
1175 *Sciences* **85**:6753–6757. doi:10.1073/pnas.85.18.6753

1176 Coppens I, Levade T, Courtoy PJ. 1995. Host plasma low density lipoprotein particles as an  
1177 essential source of lipids for the bloodstream forms of *Trypanosoma brucei*. *Journal of*  
1178 *Biological Chemistry* **270**:5736–5741. doi:10.1074/jbc.270.11.5736

1179 Cordeiro CD, Ahmed MA, Windle B, Docampo R. 2019. NUDIX hydrolases with  
1180 inorganic polyphosphate exo- and endopolyphosphatase activities in the glycosome,  
1181 cytosol and nucleus of *Trypanosoma brucei*. *Biosci Rep* **39**.  
1182 doi:10.1042/BSR20190894

1183 Creek DJ, Mazet M, Achcar F, Anderson J, Kim DH, Kamour R, Morand P, Millerioux Y,  
1184 Biran M, Kerkhoven EJ, Chokkathukalam A, Weidt SK, Burgess KEV, Breitling R,  
1185 Watson DG, Bringaud F, Barrett MP. 2015. Probing the metabolic network in  
1186 bloodstream-form *Trypanosoma brucei* using untargeted metabolomics with stable  
1187 isotope labelled glucose. *PLoS Pathog* **11**:1–25. doi:10.1371/journal.ppat.1004689

1188 Creek DJ, Nijagal B, Kim DH, Rojas F, Matthews KR, Barrett MP. 2013. Metabolomics  
1189 guides rational development of a simplified cell culture medium for drug screening  
1190 against *Trypanosoma brucei*. *Antimicrob Agents Chemother* **57**:2768–2779.  
1191 doi:10.1128/AAC.00044-13

1192 da Silva MS, Vitarelli MO, Souza BF, Elias MC. 2020. Comparative analysis of the  
1193 minimum number of replication origins in trypanosomatids and yeasts. *Genes (Basel)*  
1194 **11**:11–13. doi:10.3390/genes11050523

1195 Davies MJ, Ross AM, Gutteridge WE. 1983. The enzymes of purine salvage in  
1196 *Trypanosoma cruzi*, *Trypanosoma brucei* and *Leishmania mexicana*. *Parasitology*  
1197 **87**:211–217. doi:10.1017/S0031182000052574



1198 Dawoody Nejad L, Stumpe M, Rauch M, Hemphill A, Schneider R, Bütikofer P, Serricchio  
1199 M. 2020. Mitochondrial sphingosine-1-phosphate lyase is essential for  
1200 phosphatidylethanolamine synthesis and survival of *Trypanosoma brucei*. *Sci Rep*  
1201 **10**:1–11. doi:10.1038/s41598-020-65248-x

1202 Docampo R, Ulrich P, Moreno SNJ. 2010. Evolution of acidocalcisomes and their role in  
1203 polyphosphate storage and osmoregulation in eukaryotic microbes. *Philosophical*  
1204 *Transactions of the Royal Society B: Biological Sciences* **365**:775–784.  
1205 doi:10.1098/rstb.2009.0179

1206 Doyle JJ, Hirumi H, Hirumi K, Lupton EN, Cross GAM. 1980. Antigenic variation in  
1207 clones of animal-infective *Trypanosoma brucei* derived and maintained *in vitro*.  
1208 *Parasitology* **80**:359–369. doi:10.1017/S0031182000000810

1209 Eisenthal R, Game S, Holman GD. 1989. Specificity and kinetics of hexose transport in  
1210 *Trypanosoma brucei*. *Biochimica et Biophysica Acta (BBA) - Biomembranes* **985**:81–  
1211 89. doi:10.1016/0005-2736(89)90107-7

1212 Engstler M, Pfohl T, Herminghaus S, Boshart M, Wiegertjes G, Heddergott N, Overath P.  
1213 2007. Hydrodynamic flow-mediated protein sorting on the cell surface of  
1214 trypanosomes. *Cell* **131**:505–515. doi:10.1016/j.cell.2007.08.046

1215 Engstler M, Thilo L, Weise F, Grünfelder CG, Schwarz H, Boshart M, Overath P. 2004.  
1216 Kinetics of endocytosis and recycling of the GPI-anchored variant surface  
1217 glycoprotein in *Trypanosoma brucei*. *J Cell Sci* **117**:1105–1115.  
1218 doi:10.1242/jcs.00938

1219 Fan J, Kamphorst JJ, Mathew R, Chung MK, White E, Shlomi T, Rabinowitz JD. 2013.  
1220 Glutamine-driven oxidative phosphorylation is a major ATP source in transformed  
1221 mammalian cells in both normoxia and hypoxia. *Mol Syst Biol* **9**:712.  
1222 doi:10.1038/msb.2013.65

1223 Farmer IS, Jones CW. 1976. The energetics of *Escherichia coli* during aerobic growth in  
1224 continuous culture. *Eur J Biochem* **67**:115–122. doi:10.1111/j.1432-  
1225 1033.1976.tb10639.x

1226 Flamholz A, Phillips R, Milo R. 2014. The quantified cell. *Mol Biol Cell* **25**:3497–3500.  
1227 doi:10.1091/mbc.E14-09-1347

1228 Folkmann AW, Noble KN, Cole CN, Wentz SR. 2011. Dbp5, Gle1-IP6 and Nup159: A  
1229 working model for mRNP export. *Nucleus* **2**:540–548. doi:10.4161/nucl.2.6.17881

1230 Gadelha C, Holden JM, Allison HC, Field MC. 2011. Specializations in a successful  
1231 parasite: What makes the bloodstream-form African trypanosome so deadly? *Mol*  
1232 *Biochem Parasitol* **179**:51–58. doi:10.1016/j.molbiopara.2011.06.006

1233 Gazestani VH, Hampton M, Shaw AK, Salavati R, Zimmer SL. 2018. Tail characteristics  
1234 of *Trypanosoma brucei* mitochondrial transcripts are developmentally altered in a  
1235 transcript-specific manner. *Int J Parasitol* **48**:179–189.  
1236 doi:10.1016/j.ijpara.2017.08.012

1237 Gibellini F, Hunter WN, Smith TK. 2008. Biochemical characterization of the initial steps  
1238 of the Kennedy pathway in *Trypanosoma brucei*: The ethanolamine and choline  
1239 kinases. *Biochemical Journal* **415**:135–144. doi:10.1042/BJ20080435

1240 Gibson WC, Swinkels BW, Borst P. 1988. Post-transcriptional control of the differential  
1241 expression of phosphoglycerate kinase genes in *Trypanosoma brucei*. *J Mol Biol*  
1242 **201**:315–325. doi:10.1016/0022-2836(88)90140-4

1243 Gilinger G, Bellofatto V. 2001. Trypanosome spliced leader RNA genes contain the first  
1244 identified RNA polymerase II gene promoter in these organisms. *Nucleic Acids Res*  
1245 **29**:1556–64. doi:10.1093/nar/29.7.1556

1246 Gray A. 1995. *Trypanosoma brucei brucei*: Uptake and metabolism of pyridoxine and  
1247 pyridoxal. *Exp Parasitol* **80**:390–400. doi:10.1006/expr.1995.1051

1248 Gruenberg Jean, Sharma PR, Deshusses J. 1978. d-Glucose transport in *Trypanosoma*  
1249 *brucei*. d-glucose transport is the rate-limiting step of its metabolism. *Eur J Biochem*  
1250 **89**:461–469. doi:10.1111/j.1432-1033.1978.tb12549.x

1251 Grünfelder CG, Engstler M, Weise F, Schwarz H, Stierhof Y-D, Boshart M, Overath P.  
1252 2002. Accumulation of a GPI-Anchored protein at the cell surface requires sorting at  
1253 multiple intracellular levels. *Traffic* **3**:547–559. doi:10.1034/j.1600-  
1254 0854.2002.30805.x

1255 Grünfelder CG, Engstler M, Weise F, Schwarz H, Stierhof Y-D, Morgan GW, Field MC,  
1256 Overath P. 2003. Endocytosis of a glycosylphosphatidylinositol-anchored protein via  
1257 clathrin-coated vesicles, sorting by default in endosomes, and exocytosis via RAB11-  
1258 positive carriers. *Mol Biol Cell* **14**:2029–40. doi:10.1091/mbc.e02-10-0640

1259 Gualdron-López M, Vapola MH, Miinalainen IJ, Hiltunen JK, Michels PAM, Antonenkov  
1260 VD. 2012. Channel-forming activities in the glycosomal fraction from the bloodstream  
1261 form of *Trypanosoma brucei*. *PLoS One* **7**:e34530. doi:10.1371/journal.pone.0034530

1262 Guan XL, Mäser P. 2017. Comparative sphingolipidomics of disease-causing  
1263 trypanosomatids reveal unique lifecycle- and taxonomy-specific lipid chemistries. *Sci*  
1264 *Rep* **7**:1–13. doi:10.1038/s41598-017-13931-x

1265 Günzl A, Bruderer T, Laufer G, Tu L, Chung H, Lee P, Lee MG, Gu A, Schimanski B.  
1266 2003. RNA Polymerase I transcribes procyclin genes and variant surface glycoprotein  
1267 gene expression sites in *Trypanosoma brucei*. *Eukaryot Cell* **2**:542–551.  
1268 doi:10.1128/EC.2.3.542

1269 Haanstra JR, Stewart M, Luu V-D, van Tuijl A, Westerhoff H v, Clayton C, Bakker BM.  
1270 2008. Control and Regulation of Gene Expression: Quantitative analysis of the  
1271 expression of phosphoglycerate kinase in bloodstream form *Trypanosoma brucei*.  
1272 *Journal of Biological Chemistry* **283**:2495–2507. doi:10.1074/jbc.M705782200

1273 Haanstra JR, van Tuijl A, van Dam J, van Winden W, Tielens AGM, van Hellemond JJ,  
1274 Bakker BM. 2012. Proliferating bloodstream-form *Trypanosoma brucei* use a  
1275 negligible part of consumed glucose for anabolic processes. *Int J Parasitol* **42**:667–  
1276 673. doi:10.1016/j.ijpara.2012.04.009

1277 Hannan LA, Newmyer SL, Schmid SL. 1998. ATP- and cytosol-dependent release of  
1278 adaptor proteins from clathrin-coated vesicles: A dual role for Hsc70. *Mol Biol Cell*  
1279 **9**:2217–29. doi:10.1091/mbc.9.8.2217

1280 Hecker H, Bender K, Betschart B, Modespacher UP. 1989. Instability of the nuclear  
1281 chromatin of procyclic *Trypanosoma brucei brucei*. *Mol Biochem Parasitol* **37**:225–  
1282 234. doi:10.1016/0166-6851(89)90154-0

1283 Heddergott N, Krüger T, Babu SB, Wei A, Stellamanns E, Uppaluri S, Pfohl T, Stark H,  
1284 Engstler M. 2012. Trypanosome motion represents an adaptation to the crowded  
1285 environment of the vertebrate bloodstream. *PLoS Pathog* **8**.  
1286 doi:10.1371/journal.ppat.1003023

1287 Helfert S, Estévez AM, Bakker B, Michels P, Clayton C. 2001. Roles of triosephosphate  
1288 isomerase and aerobic metabolism in *Trypanosoma brucei*. *Biochemical Journal*  
1289 **357**:117. doi:10.1042/0264-6021:3570117

1290 Hirumi H, Hirumi K. 1989. Continuous cultivation of *Trypanosoma brucei* blood stream  
1291 forms in a medium containing a low concentration of serum protein without feeder cell  
1292 layers. *J Parasitol* **75**:985–9.

1293 Höög JL, Lacomble S, O'Toole ET, Hoenger A, McIntosh JR, Gull K. 2014. Modes of  
1294 flagellar assembly in *Chlamydomonas reinhardtii* and *Trypanosoma brucei*. *Elife* **3**:1–  
1295 24. doi:10.7554/elife.01479

1296 Hsin JP, Manley JL. 2012. The RNA polymerase II CTD coordinates transcription and  
1297 RNA processing. *Genes Dev* **26**:2119–2137. doi:10.1101/gad.200303.112

1298 Imhof S, Zhang J, Wang H, Huy Bui K, Nguyen H, Atanasov I, Hui WH, Kai Yang S,  
1299 Zhou ZH, Hill KL. 2019. Cryo electron tomography with volta phase plate reveals  
1300 novel structural foundations of the 96-nm axonemal repeat in the pathogen  
1301 *Trypanosoma brucei*. *Elife* **8**:1–30. doi:10.7554/eLife.52058

1302 Jäger A v, de Gaudenzi JG, Cassola A, D'Orso I, Frasch AC. 2007. mRNA maturation by  
1303 two-step trans-splicing/polyadenylation processing in trypanosomes. *Proc Natl Acad*  
1304 *Sci U S A* **104**:2035–42. doi:10.1073/pnas.0611125104

1305 Jenkins TM, Eienthal R, Weitzman PDJ. 1988. Two distinct succinate thiokinases in both  
1306 bloodstream and procyclic forms of *Trypanosoma brucei*. *Biochem Biophys Res*  
1307 *Commun* **151**:257–261. doi:10.1016/0006-291X(88)90587-6

1308 Jensen RE, Englund PT. 2012. Network news: The replication of kinetoplast DNA. *Annu*  
1309 *Rev Microbiol* **66**:473–491. doi:10.1146/annurev-micro-092611-150057

1310 Johnson PJ, Kooter JM, Borst P. 1987. Inactivation of transcription by UV irradiation of T.  
1311 *brucei* provides evidence for a multicistronic transcription unit including a VSG gene.  
1312 *Cell* **51**:273–281. doi:10.1016/0092-8674(87)90154-1

1313 Kaksonen M, Roux A. 2018. Mechanisms of clathrin-mediated endocytosis. *Nat Rev Mol*  
1314 *Cell Biol* **19**:313–326. doi:10.1038/nrm.2017.132

1315 Kariuki, Stijlemans, Magez. 2019. The trypanosomal transferrin receptor of *Trypanosoma*  
1316 *brucei*—A Review. *Trop Med Infect Dis* **4**:126. doi:10.3390/tropicalmed4040126

1317 Kirby LE, Sun Y, Judah D, Nowak S, Koslowsky D. 2016. Analysis of the *Trypanosoma*  
1318 *brucei* EATRO 164 bloodstream guide rna transcriptome. *PLoS Negl Trop Dis* **10**:1–  
1319 18. doi:10.1371/journal.pntd.0004793

1320 Kooter JM, van der Spek HJ, Wagter R, d'Oliveira CE, van der Hoeven F, Johnson PJ,  
1321 Borst P. 1987. The anatomy and transcription of a telomeric expression site for  
1322 variant-specific surface antigens in *T. brucei*. *Cell* **51**:261–272. doi:10.1016/0092-  
1323 8674(87)90153-X

1324 Koslowsky D, Sun Y, Hindenach J, Theisen T, Lucas J. 2014. The insect-phase gRNA  
1325 transcriptome in *Trypanosoma brucei*. *Nucleic Acids Res* **42**:1873–1886.  
1326 doi:10.1093/nar/gkt973

1327 Koslowsky DJ, Yahampath G. 1997. Mitochondrial mRNA 3' cleavage/polyadenylation  
1328 and RNA editing in *Trypanosoma brucei* are independent events. *Mol Biochem*  
1329 *Parasitol* **90**:81–94. doi:10.1016/S0166-6851(97)00133-3

1330 Koyfman AY, Schmid MF, Gheiratmand L, Fu CJ, Khant HA, Huang D, He CY, Chiu W.  
1331 2011. Structure of *Trypanosoma brucei* flagellum accounts for its bihelical motion.  
1332 *Proc Natl Acad Sci U S A* **108**:11105–8. doi:10.1073/pnas.1103634108

1333 Lamour N, Riviere L, Coustou V, Coombs GH, Barrett MP, Bringaud FF. 2005. Proline  
1334 metabolism in procyclic *Trypanosoma brucei* is down-regulated in the presence of  
1335 glucose. *Journal of Biological Chemistry* **280**:11902–11910.  
1336 doi:10.1074/jbc.M414274200

1337 Lander N, Cordeiro C, Huang G, Docampo R. 2016. Polyphosphate and acidocalcisomes.  
1338 *Biochem Soc Trans* **44**:1–6. doi:10.1042/BST20150193

1339 Lander N, Ulrich PN, Docampo R. 2013. *Trypanosoma brucei* vacuolar transporter  
1340 chaperone 4 (TbVtc4) is an acidocalcisome polyphosphate kinase required for in vivo  
1341 infection. *J Biol Chem* **288**:34205–34216. doi:10.1074/jbc.M113.518993

1342 Lee SH, Stephens JL, Paul KS, Englund PT. 2006. Fatty acid synthesis by elongases in  
1343 trypanosomes. *Cell* **126**:691–699. doi:10.1016/j.cell.2006.06.045

1344 Lemercier G, Espiau B, Ruiz FA, Vieira M, Luo S, Baltz T, Docampo R, Bakalara N. 2004.  
1345 A pyrophosphatase regulating polyphosphate metabolism in acidocalcisomes is  
1346 essential for *Trypanosoma brucei* virulence in mice. *Journal of Biological Chemistry*  
1347 **279**:3420–3425. doi:10.1074/jbc.M309974200

1348 Lilley AC, Major L, Young S, Stark MJR, Smith TK. 2014. The essential roles of cytidine  
1349 diphosphate-diacylglycerol synthase in bloodstream form *Trypanosoma brucei*. *Mol*  
1350 *Microbiol* **92**:453–470. doi:10.1111/mmi.12553

1351 Lin J, Okada K, Raytchev M, Smith MC, Nicastro D. 2014. Structural mechanism of the  
1352 dynein power stroke. *Nat Cell Biol* **16**:479–85. doi:10.1038/ncb2939

1353 Link F, Borges AR, Jones NG, Engstler M. 2021. To the surface and back: exo- and  
1354 endocytic pathways in *Trypanosoma brucei*. *Front Cell Dev Biol* **9**:720521.  
1355 doi:10.3389/fcell.2021.720521

- Lowell JE, Kaiser F, Janzen CJ, Cross GAM. 2005. Histone H2AZ dimerizes with a novel variant H2B and is enriched at repetitive DNA in *Trypanosoma brucei*. *J Cell Sci* **118**:5721–5730. doi:10.1242/jcs.02688
- Luévano-Martínez LA, Girard RMBM, Alencar MB, Silber AM. 2020. ATP regulates the activity of an alternative oxidase in *Trypanosoma brucei*. *FEBS Lett* **594**:2150–2158. doi:10.1002/1873-3468.13790
- Luo S, Rohloff P, Cox J, Uyemura SA, Docampo R. 2004. *Trypanosoma brucei* plasma membrane-type  $\text{Ca}^{2+}$ -ATPase 1 (TbPMC1) and 2 (TbPMC2) genes encode functional  $\text{Ca}^{2+}$ -ATPases localized to the acidocalcisomes and plasma membrane, and essential for  $\text{Ca}^{2+}$  homeostasis and growth. *Journal of Biological Chemistry* **279**:14427–14439. doi:10.1074/jbc.M309978200
- Lynch M, Marinov GK. 2017. Membranes, energetics, and evolution across the prokaryote-eukaryote divide. *Elife* **6**:1–30. doi:10.7554/eLife.20437
- Lynch M, Marinov GK. 2015. The bioenergetic costs of a gene. *Proc Natl Acad Sci U S A* **112**:15690–15695. doi:10.1073/pnas.1514974112
- Macêdo JP, Schmidt RS, Mäser P, Rentsch D, Vial HJ, Sigel E, Bütikofer P. 2013. Characterization of choline uptake in *Trypanosoma brucei* procyclic and bloodstream forms. *Mol Biochem Parasitol* **190**:16–22. doi:10.1016/j.molbiopara.2013.05.007
- Mahmoudabadi G, Phillips R, Lynch M, Milo R. 2019. Defining the energetic costs of cellular structures. *bioRxiv* 1–14. doi:10.1101/666040
- Majka J, Chung BY, Burgers PMJ. 2004. Requirement for ATP by the DNA damage checkpoint clamp loader. *Journal of Biological Chemistry* **279**:20921–20926. doi:10.1074/jbc.M400898200
- Manna PT, Boehm C, Leung KF, Natesan SK, Field MC. 2014. Life and times: synthesis, trafficking, and evolution of VSG. *Trends Parasitol* **30**:251–8. doi:10.1016/j.pt.2014.03.004
- Mantilla BS, Marchese L, Casas-Sánchez A, Dyer NA, Ejeh N, Biran M, Bringaud F, Lehane MJ, Acosta-Serrano A, Silber AM. 2017. Proline metabolism is essential for *Trypanosoma brucei brucei* survival in the tsetse vector. *PLoS Pathog* **13**:1–29. doi:10.1371/journal.ppat.1006158
- Martin KL, Smith TK. 2006. The glycosylphosphatidylinositol (GPI) biosynthetic pathway of bloodstream-form *Trypanosoma brucei* is dependent on the de novo synthesis of inositol. *Mol Microbiol* **61**:89–105. doi:10.1111/j.1365-2958.2006.05216.x
- Matera AG, Wang Z. 2014. A day in the life of the spliceosome. *Nat Rev Mol Cell Biol* **15**:108–121. doi:10.1038/nrm3742
- Mazet M, Morand P, Biran M, Bouyssou G, Courtois P, Daulouède S, Millerioux Y, Franconi J-M, Vincendeau P, Moreau P, Bringaud F. 2013. Revisiting the central metabolism of the bloodstream forms of *Trypanosoma brucei*: production of acetate in the mitochondrion is essential for parasite viability. *PLoS Negl Trop Dis* **7**:e2587. doi:10.1371/journal.pntd.0002587



1396 Melville SE, Leech V, Navarro M, Cross GAM. 2000. The molecular karyotype of the  
1397 megabase chromosomes of *Trypanosoma brucei* stock 427. *Mol Biochem Parasitol*  
1398 **111**:261–273. doi:10.1016/S0166-6851(00)00316-9

1399 Michaeli S. 2011. *Trans* -splicing in trypanosomes: machinery and its impact on the  
1400 parasite transcriptome. *Future Microbiol* **6**:459–474. doi:10.2217/fmb.11.20

1401 Michels PAM, Villafranz O, Pineda E, Alencar MB, Cáceres AJ, Silber AM, Bringaud F.  
1402 2021. Carbohydrate metabolism in trypanosomatids: New insights revealing novel  
1403 complexity, diversity and species-unique features. *Exp Parasitol* **224**:108102.  
1404 doi:10.1016/j.exppara.2021.108102

1405 Miller EN, Turner MJ. 1981. Analysis of antigenic types appearing in first relapse  
1406 populations of clones of *Trypanosoma brucei*. *Parasitology* **82**:63–80.  
1407 doi:10.1017/S0031182000041871

1408 Millerioux Y, Morand P, Biran M, Mazet M, Moreau P, Wagnies M, Ebikeme C,  
1409 Deramchia K, Gales L, Portais JC, Boshart M, Franconi JM, Bringaud F. 2012. ATP  
1410 synthesis-coupled and -uncoupled acetate production from acetyl-CoA by  
1411 mitochondrial acetate:Succinate CoA-transferase and acetyl-CoA thioesterase in  
1412 *Trypanosoma*. *Journal of Biological Chemistry* **287**:17186–17197.  
1413 doi:10.1074/jbc.M112.355404

1414 Milo R. 2013. What is the total number of protein molecules per cell volume? A call to  
1415 rethink some published values. *BioEssays* **35**:1050–1055. doi:10.1002/bies.201300066

1416 Milo R, Jorgensen P, Moran U, Weber G, Springer M. 2010. BioNumbers—the database of  
1417 key numbers in molecular and cell biology. *Nucleic Acids Res* **38**:D750–D753.  
1418 doi:10.1093/nar/gkp889

1419 Milo R, Phillips R. 2015. Cell Biology by the Numbers. Garland Science.  
1420 doi:10.1201/9780429258770

1421 Mochizuki K, Inaoka DK, Mazet M, Shiba T, Fukuda K, Kurasawa H, Millerioux Y,  
1422 Boshart M, Balogun EO, Harada S, Hirayama K, Bringaud F, Kita K. 2020. The  
1423 ASCT/SCS cycle fuels mitochondrial ATP and acetate production in *Trypanosoma*  
1424 *brucei*. *Biochimica et Biophysica Acta (BBA) - Bioenergetics* **1861**:148283.  
1425 doi:10.1016/j.bbabi.2020.148283

1426 Moreno SNJ, Docampo R. 2013. Polyphosphate and its diverse functions in host cells and  
1427 pathogens. *PLoS Pathog* **9**:e1003230. doi:10.1371/journal.ppat.1003230

1428 Müller LSM, Cosentino RO, Förstner KU, Guizetti J, Wedel C, Kaplan N, Janzen CJ,  
1429 Arampatzi P, Vogel J, Steinbiss S, Otto TD, Saliba AE, Sebra RP, Siegel TN. 2018.  
1430 Genome organization and DNA accessibility control antigenic variation in  
1431 trypanosomes. *Nature* **563**:121–125. doi:10.1038/s41586-018-0619-8

1432 Naguleswaran A, Doiron N, Roditi I. 2018. RNA-Seq analysis validates the use of culture-  
1433 derived *Trypanosoma brucei* and provides new markers for mammalian and insect  
1434 life-cycle stages. *BMC Genomics* **19**:227. doi:10.1186/s12864-018-4600-6

1435 Negreiros RS, Lander N, Huang G, Cordeiro CD, Smith SA, Morrissey JH, Docampo R.  
1436 2018. Inorganic polyphosphate interacts with nucleolar and glycosomal proteins in  
1437 trypanosomatids. *Mol Microbiol* **110**:973–994. doi:10.1111/mmi.14131

1438 Nolan DP, Paul Voorheis H. 2000. Factors that determine the plasma-membrane potential  
1439 in bloodstream forms of *Trypanosoma brucei*. *Eur J Biochem* **267**:4615–4623.  
1440 doi:10.1046/j.1432-1327.2000.01477.x

1441 Nolan DP, Voorheis HP. 1992. The mitochondrion in bloodstream forms of *Trypanosoma*  
1442 *brucei* is energized by the electrogenic pumping of protons catalysed by the F1F0-  
1443 ATPase. *Eur J Biochem* **209**:207–16. doi:10.1111/j.1432-1033.1992.tb17278.x

1444 Obado SO, Brillantes M, Uryu K, Zhang W, Ketaren NE, Chait BT, Field MC, Rout MP.  
1445 2016. Interactome mapping reveals the evolutionary history of the nuclear pore  
1446 complex. *PLoS Biol* **14**:1–30. doi:10.1371/journal.pbio.1002365

1447 Oppenheimer FR. 1987. Compartmentation of carbohydrate metabolism in trypanosomes.  
1448 *Annu Rev Microbiol* **41**:127–151. doi:10.1146/annurev.mi.41.100187.001015

1449 Oppenheimer FR, Baudhuin P, Coppens I, de Roe C, Edwards SW, Weijers PJ, Misset O.  
1450 1984. Purification, morphometric analysis, and characterization of the glycosomes  
1451 (microbodies) of the protozoan hemoflagellate *Trypanosoma brucei*. *Journal of Cell*  
1452 *Biology* **98**:1178–1184. doi:10.1083/jcb.98.4.1178

1453 Oppenheimer FR, Borst P. 1977. Localization of nine glycolytic enzymes in a microbody-like  
1454 organelle in *Trypanosoma brucei*: The glycosome. *FEBS Lett* **80**:360–364.  
1455 doi:10.1016/0014-5793(77)80476-6

1456 Osinga KA, Swinkels BW, Gibson WC, Borst P, Veeneman GH, van Boom JH, Michels  
1457 PA, Oppenheimer FR. 1985. Topogenesis of microbody enzymes: a sequence  
1458 comparison of the genes for the glycosomal (microbody) and cytosolic  
1459 phosphoglycerate kinases of *Trypanosoma brucei*. *EMBO J* **4**:3811–3817.  
1460 doi:10.1002/j.1460-2075.1985.tb04152.x

1461 Panicucci B, Gahura O, Zíková A. 2017. *Trypanosoma brucei* TbIF1 inhibits the essential  
1462 F1-ATPase in the infectious form of the parasite. *PLoS Negl Trop Dis* **11**:1–21.  
1463 doi:10.1371/journal.pntd.0005552

1464 Paraan M, Mendez J, Sharum S, Kurtin D, He H, Stagg SM. 2020. The structures of  
1465 natively assembled clathrin-coated vesicles. *Sci Adv* **6**:eaba8397.  
1466 doi:10.1126/sciadv.aba8397

1467 Patnaik PK, Field MC, Menon AK, Cross GAM, Yee MC, Bütikofer P. 1993. Molecular  
1468 species analysis of phospholipids from *Trypanosoma brucei* bloodstream and  
1469 procyclic forms. *Mol Biochem Parasitol* **58**:97–105. doi:10.1016/0166-  
1470 6851(93)90094-E

1471 Paul KS, Jiang D, Morita YS, Englund PT. 2001. Fatty acid synthesis in African  
1472 trypanosomes: a solution to the myristate mystery. *Trends Parasitol* **17**:381–387.  
1473 doi:10.1016/S1471-4922(01)01984-5



1474 Peth A, Nathan JA, Goldberg AL. 2013. The ATP costs and time required to degrade  
1475 ubiquitinated proteins by the 26 S proteasome. *Journal of Biological Chemistry*  
1476 **288**:29215–29222. doi:10.1074/jbc.M113.482570

1477 Poudyal NR, Paul KS. 2022. Fatty acid uptake in *Trypanosoma brucei*: Host resources and  
1478 possible mechanisms. *Front Cell Infect Microbiol* **12**. doi:10.3389/fcimb.2022.949409

1479 Ralston KS, Hill KL. 2008. The flagellum of *Trypanosoma brucei*: new tricks from an old  
1480 dog. *Int J Parasitol* **38**:869–84. doi:10.1016/j.ijpara.2008.03.003

1481 Ramanagoudr-Bhojappa R, Chib S, Byrd AK, Aarattuthodiyil S, Pandey M, Patel SS,  
1482 Raney KD. 2013. Yeast Pif1 helicase exhibits a one-base-pair stepping mechanism for  
1483 unwinding duplex DNA. *Journal of Biological Chemistry* **288**:16185–16195.  
1484 doi:10.1074/jbc.M113.470013

1485 Read LK, Lukeš J, Hashimi H. 2016. Trypanosome RNA editing: the complexity of getting  
1486 U in and taking U out. *WIREs RNA* **7**:33–51. doi:10.1002/wrna.1313

1487 Reynolds D, Hofmeister BT, Cliffe L, Alabady M, Siegel TN, Schmitz RJ, Sabatini R.  
1488 2016. Histone H3 variant regulates rna polymerase II transcription termination and  
1489 dual strand transcription of siRNA loci in *Trypanosoma brucei*. *PLoS Genet*  
1490 **12**:e1005758. doi:10.1371/journal.pgen.1005758

1491 Richmond GS, Gibellini F, Young SA, Major L, Denton H, Lilley A, Smith TK. 2010.  
1492 Lipidomic analysis of bloodstream and procyclic form *Trypanosoma brucei*.  
1493 *Parasitology* **137**:1357–1392. doi:10.1017/S0031182010000715

1494 Rojas F, Silvester E, Young J, Milne R, Tetey M, Houston DR, Walkinshaw MD, Pérez-Pi  
1495 I, Auer M, Denton H, Smith TK, Thompson J, Matthews KR. 2019. Oligopeptide  
1496 signaling through TbGPR89 drives trypanosome quorum sensing. *Cell* **176**:306-  
1497 317.e16. doi:10.1016/j.cell.2018.10.041

1498 Rotureau B, Subota I, Bastin P. 2011. Molecular bases of cytoskeleton plasticity during the  
1499 *Trypanosoma brucei* parasite cycle. *Cell Microbiol* **13**:705–716. doi:10.1111/j.1462-  
1500 5822.2010.01566.x

1501 Russell JB, Cook GM. 1995. Energetics of bacterial growth: Balance of anabolic and  
1502 catabolic reactions. *Microbiol Rev* **59**:48–62. doi:10.1128/mmbr.59.1.48-62.1995

1503 RYLEY JF. 1962. Studies on the metabolism of the protozoa. 9. Comparative metabolism  
1504 of blood-stream and culture forms of *Trypanosoma rhodesiense*. *Biochem J* **85**:211–  
1505 23. doi:10.1042/bj0850211

1506 Schnauffer A, Clark-Walker GD, Steinberg AG, Stuart K. 2005. The F1-ATP synthase  
1507 complex in bloodstream stage trypanosomes has an unusual and essential function.  
1508 *EMBO J* **24**:4029–40. doi:10.1038/sj.emboj.7600862

1509 Schulz D, Zaringhalam M, Papavasiliou FN, Kim HS. 2016. Base J and H3.V Regulate  
1510 Transcriptional Termination in *Trypanosoma brucei*. *PLoS Genet* **12**:1–21.  
1511 doi:10.1371/journal.pgen.1005762

1512 Sement FM, Suematsu T, Zhang L, Yu T, Huang L, Aphasizheva I, Aphasizhev R. 2018.  
1513 Transcription initiation defines kinetoplast RNA boundaries. *Proc Natl Acad Sci U S A*  
1514 **115**:E10323–E10332. doi:10.1073/pnas.1808981115

Shimogawa MM, Ray SS, Kisalu N, Zhang Y, Geng Q, Ozcan A, Hill KL. 2018. Parasite motility is critical for virulence of African trypanosomes. *Sci Rep* **8**:9122. doi:10.1038/s41598-018-27228-0

Siegel TN, Hekstra DR, Kemp LE, Figueiredo LM, Lowell JE, Fenyo D, Wang X, Dewell S, Cross GAMM. 2009. Four histone variants mark the boundaries of polycistronic transcription units in *Trypanosoma brucei*. *Genes Dev* **23**:1063–1076. doi:10.1101/gad.1790409

Siegel TN, Hekstra DR, Wang X, Dewell S, Cross G a M. 2010. Genome-wide analysis of mRNA abundance in two life-cycle stages of *Trypanosoma brucei* and identification of splicing and polyadenylation sites. *Nucleic Acids Res* **38**:4946–57. doi:10.1093/nar/gkq237

Smith DJ, Whitehouse I. 2012. Intrinsic coupling of lagging-strand synthesis to chromatin assembly. *Nature* **483**:434–438. doi:10.1038/nature10895

Stellamanns E, Uppaluri S, Hochstetter A, Heddergott N, Engstler M, Pfohl T. 2014. Optical trapping reveals propulsion forces, power generation and motility efficiency of the unicellular parasites *Trypanosoma brucei brucei*. *Sci Rep* **4**:1–7. doi:10.1038/srep06515

Stillman B. 2018. Histone modifications: insights into their influence on gene expression. *Cell* **175**:6–9. doi:10.1016/j.cell.2018.08.032

Stoffel SA, Rodenko B, Schweingruber AM, Mäser P, de Koning HP, Schweingruber ME. 2006. Biosynthesis and uptake of thiamine (vitamin B1) in bloodstream form *Trypanosoma brucei brucei* and interference of the vitamin with melarsen oxide activity. *Int J Parasitol* **36**:229–236. doi:10.1016/j.ijpara.2005.10.003

Stouthamer AH. 1973. A theoretical study on the amount of ATP required for synthesis of microbial cell material. *Antonie Van Leeuwenhoek* **39**:545–565. doi:10.1007/BF02578899

Stouthamer AH, Bettenhausen C. 1973. Utilization of energy for growth and maintenance in continuous and batch cultures of microorganisms. *Biochimica et Biophysica Acta (BBA) - Reviews on Bioenergetics* **301**:53–70. doi:10.1016/0304-4173(73)90012-8

ter Kuile BH, Opperdoes FR. 1991. Glucose uptake by *Trypanosoma brucei*. Rate-limiting steps in glycolysis and regulation of the glycolytic flux. *Journal of Biological Chemistry* **266**:857–862. doi:10.1016/S0021-9258(17)35252-3

Tetaud E, Barret MP, Bringaud F, Baltz T. 1997. Kinetoplastid glucose transporters. *Biochemical Journal* **325**:569–580. doi:10.1042/bj3250569

Tinti M, Güther MLS, Crozier TWM, Lamond AI, Ferguson MAJ. 2019. Proteome turnover in the bloodstream and procyclic forms of *trypanosoma brucei* measured by quantitative proteomics. *Wellcome Open Res* **4**:1–26. doi:10.12688/wellcomeopenres.15421.1

Tiwari K, Dubey VK. 2018. Fresh insights into the pyrimidine metabolism in the trypanosomatids. *Parasit Vectors* **11**:1–15. doi:10.1186/s13071-018-2660-8

1555 Trott L, Hafezparast M, Madzvamuse A. 2018. A mathematical understanding of how  
1556 cytoplasmic dynein walks on microtubules. *R Soc Open Sci* **5**:171568.  
1557 doi:10.1098/rsos.171568

1558 Turnock Daniel C, Ferguson MAJ. 2007. Sugar nucleotide pools of *Trypanosoma brucei*,  
1559 *Trypanosoma cruzi*, and *Leishmania major*. *Eukaryot Cell* **6**:1450–63.  
1560 doi:10.1128/EC.00175-07

1561 van Hellemond JJ, Tielens AGM. 2006. Adaptations in the lipid metabolism of the  
1562 protozoan parasite *Trypanosoma brucei*. *FEBS Lett* **580**:5552–5558.  
1563 doi:10.1016/j.febslet.2006.07.056

1564 Vanderheyden N, Wong J, Docampo R. 2000. A pyruvate-proton symport and an H<sup>+</sup>-  
1565 ATPase regulate the intracellular pH of *Trypanosoma brucei* at different stages of its  
1566 life cycle. *Biochem J* **346 Pt 1**:53–62.

1567 Verner Z, Basu S, Benz C, Dixit S, Dobáková E, Faktorová D, Hashimi H, Horáková E,  
1568 Huang Z, Paris Z, Peña-Díaz P, Ridlon L, Týč J, Wildridge D, Zíková A, Lukeš J,  
1569 Luke J. 2015. Malleable mitochondrion of *Trypanosoma brucei*, international review  
1570 of cell and molecular biology. Elsevier Inc. doi:10.1016/bs.ircmb.2014.11.001

1571 Visser N, Opperdoes FR. 1980. Glycolysis in *Trypanosoma brucei*. *Eur J Biochem*  
1572 **103**:623–632. doi:10.1111/j.1432-1033.1980.tb05988.x

1573 Wang W, Carey M, Gralla JD. 1992. Polymerase II promoter activation: closed complex  
1574 formation and ATP-driven start site opening. *Science (1979)* **255**:450–453.  
1575 doi:10.1126/science.1310361

1576 Wilkinson SR, Prathalingam SR, Taylor MC, Horn D, Kelly JM. 2005. Vitamin C  
1577 biosynthesis in trypanosomes: a role for the glycosome. *Proc Natl Acad Sci U S A*  
1578 **102**:11645–50. doi:10.1073/pnas.0504251102

1579 Wodke JAH, Puchałka J, Lluch-Senar M, Marcos J, Yus E, Godinho M, Gutiérrez-Gallego  
1580 R, dos Santos VAPM, Serrano L, Klipp E, Maier T. 2013. Dissecting the energy  
1581 metabolism in *Mycoplasma pneumoniae* through genome-scale metabolic modeling.  
1582 *Mol Syst Biol* **9**:653. doi:10.1038/msb.2013.6

1583 Yan M, Gralla JD. 1997. Multiple ATP-dependent steps in RNA polymerase II promoter  
1584 melting and initiation. *EMBO Journal* **16**:7457–7467. doi:10.1093/emboj/16.24.7457

1585 Zíková A, Verner Z, Nenarokova A, Michels PAM, Lukeš J. 2017. A paradigm shift: The  
1586 mitoproteomes of procyclic and bloodstream *Trypanosoma brucei* are comparably  
1587 complex. *PLoS Pathog* **13**:e1006679. doi:10.1371/journal.ppat.1006679

1588
